# Supplementary material for: Accurately metal-modulated bimetallic metal–organic frameworks as advanced trifunctional electrocatalysts
Source: Royal Society of Chemistry journal article supplement (doi:10.1039/d1ta01224j), 2021-01-01
Supplement: d1ta01224j1.pdf [file d1ta01224j1.pdf]

# Electronic Supplementary material for

## **Accurately Metal-Modulated Bimetallic Metal-Organic Frameworks as an Advanced Trifunctional Electrocatalyst**

Xin Chen,<sup>1</sup> Bing Shao,<sup>1</sup> Meng-Juan Tang,<sup>1</sup> Xing-Lu He,<sup>1</sup> Fu-Jie Yang,<sup>3</sup> Ze-Ping Guo,<sup>4</sup>  
Zhong Zhang,<sup>1</sup> Chun-Ting He,<sup>\*2</sup> Fu-Ping Huang,<sup>\*1</sup> Jin Huang<sup>\*1</sup>

*<sup>1</sup>School of Chemistry and Pharmacy, Guangxi Normal University, Guilin 541004, P. R. China*

*<sup>2</sup>Key Laboratory of Functional Small Organic Molecule, Ministry of Education, College of Chemistry and Chemical Engineering, Jiangxi Normal University, Nanchang 330022, China*

*<sup>3</sup>College Chemistry and Chemical Engineering, Zhongkai University of Agriculture and Engineering, Guangzhou 510275, P. R. China*

*<sup>4</sup>School of Physical Science and Technology, Guangxi Normal University, Guilin 541004, P. R. China*

\*E-mail: [hct@jxnu.edu.cn](mailto:hct@jxnu.edu.cn), [huangfp2010@163.com](mailto:huangfp2010@163.com), [huangjin@mailbox.gxnu.edu.cn](mailto:huangjin@mailbox.gxnu.edu.cn)

(a)

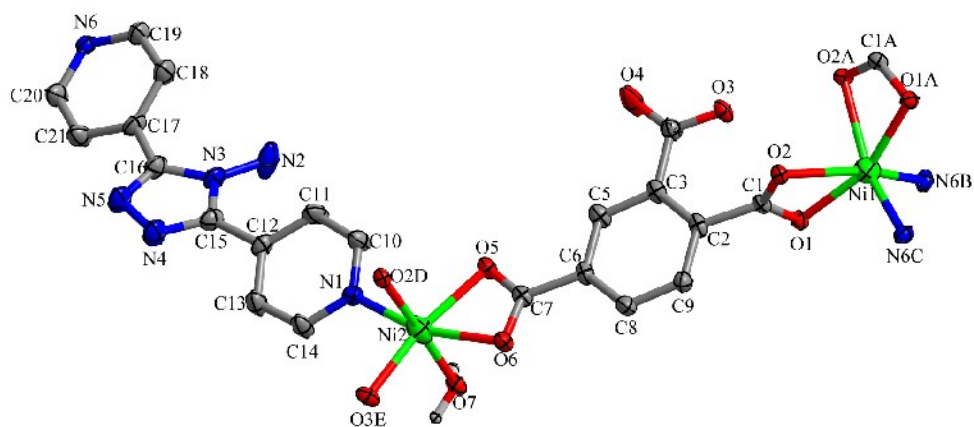

(b)

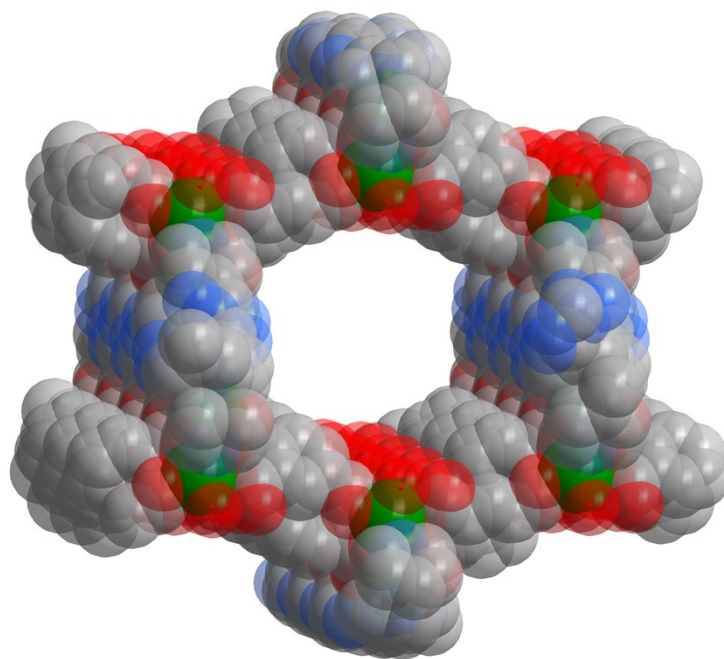

**Figure S1.** (a) The asymmetric unit of Ni<sub>3</sub>-MOF (Symmetry codes: A = -x+1, y, -z-1/2; B = -x-1/2, y-1/2, -z-1/2; C = x+3/2, y-1/2, z; D = -x+1/2, -y+1/2, -z; E = x-1/2, -y+1/2, z+1/2, hydrogen atoms and guest molecule are omitted for clarity). (b) Three-dimensional structure of Ni<sub>3</sub>-MOF.

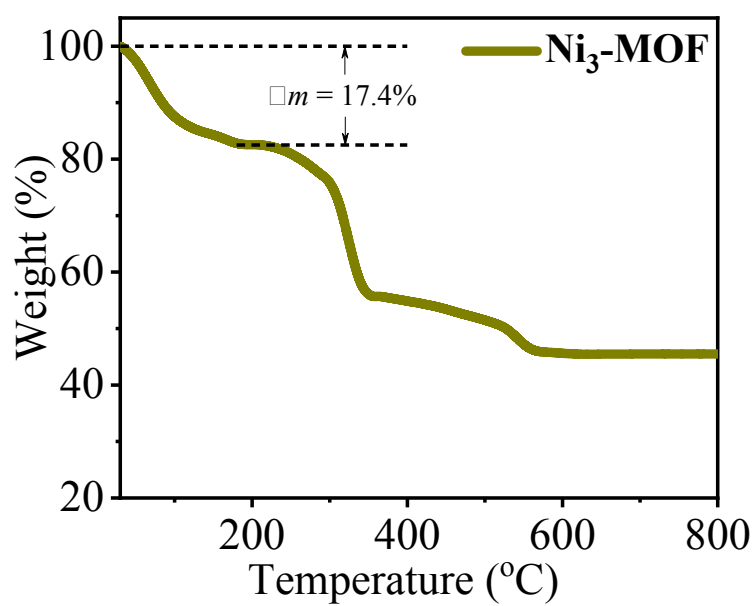

**Figure S2.** Thermogravimetry curve of Ni<sub>3</sub>-MOF measured at N<sub>2</sub> atmosphere.

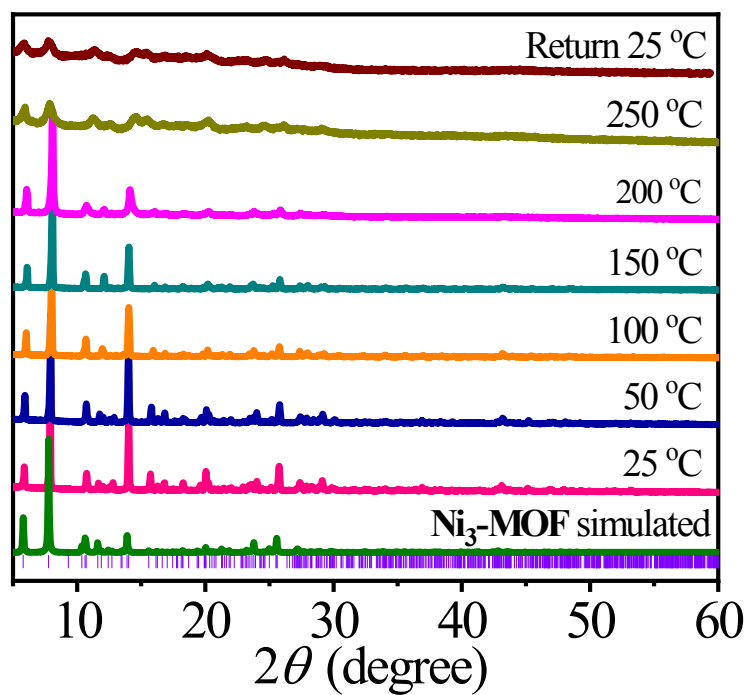

**Figure S3.** In-situ warm-keeping PXRD patterns of Ni<sub>3</sub>-MOF under N<sub>2</sub> atmosphere.

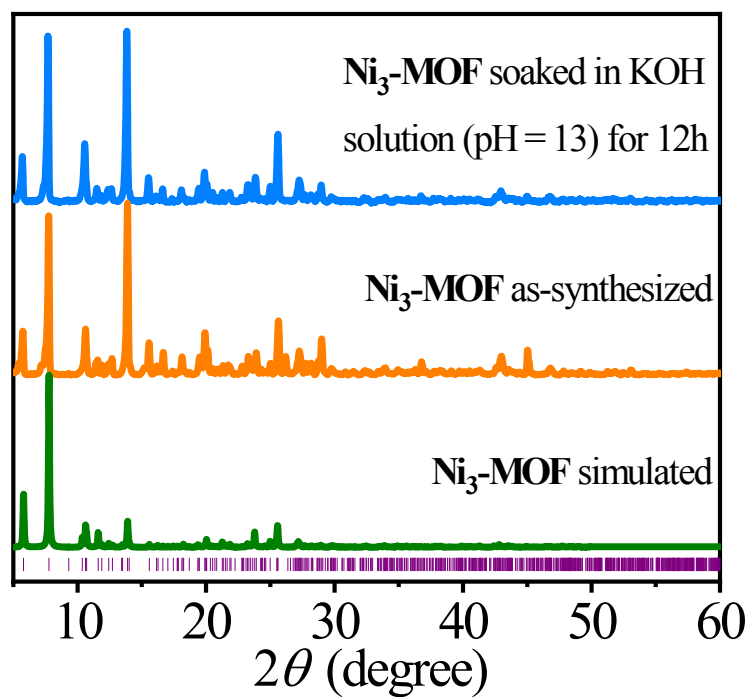

**Figure S4.** PXRD patterns of  $\text{Ni}_3\text{-MOF}$  in 0.1 M KOH solution (pH = 13).

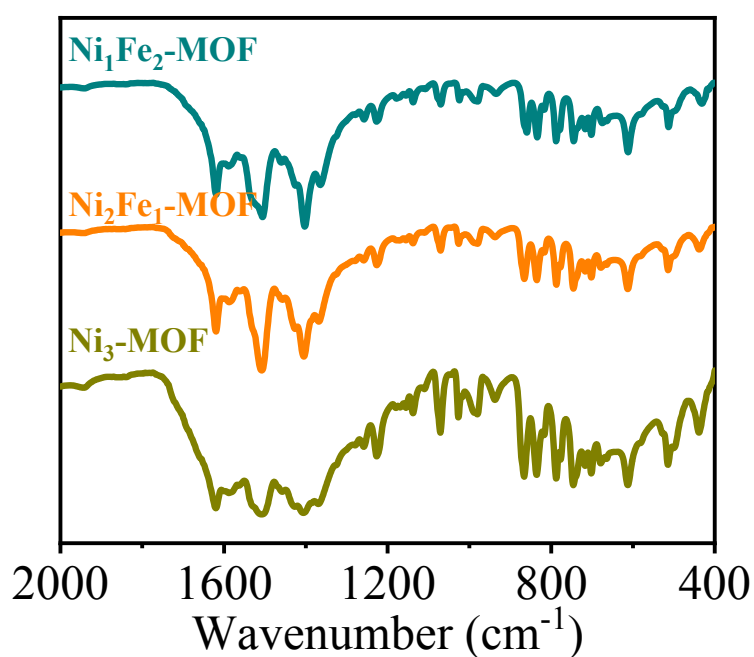

**Figure S5.** Infrared spectra of  $\text{Ni}_3\text{-MOF}$ ,  $\text{Ni}_2\text{Fe}_1\text{-MOF}$  and  $\text{Ni}_1\text{Fe}_2\text{-MOF}$ .

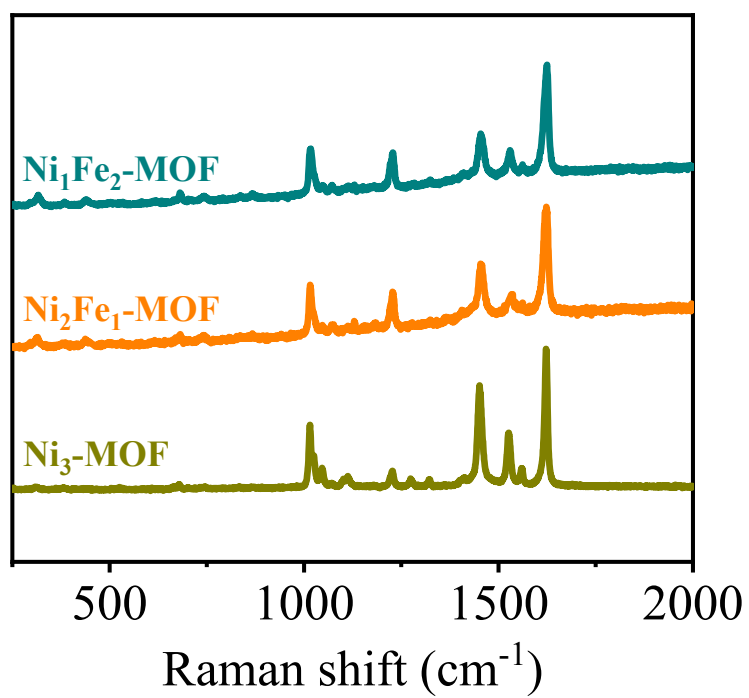

**Figure S6.** Raman spectra of Ni<sub>3</sub>-MOF, Ni<sub>2</sub>Fe<sub>1</sub>-MOF and Ni<sub>1</sub>Fe<sub>2</sub>-MOF.

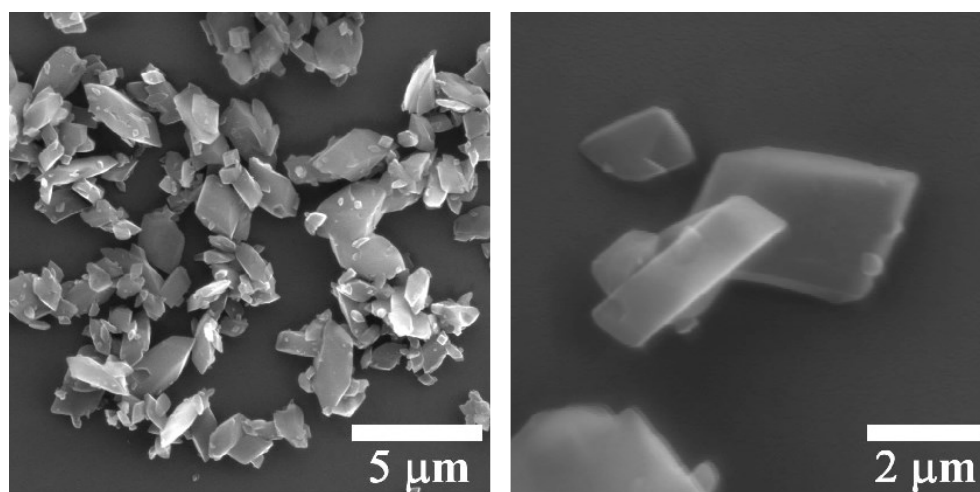

**Figure S7.** SEM images of Ni<sub>3</sub>-MOF.

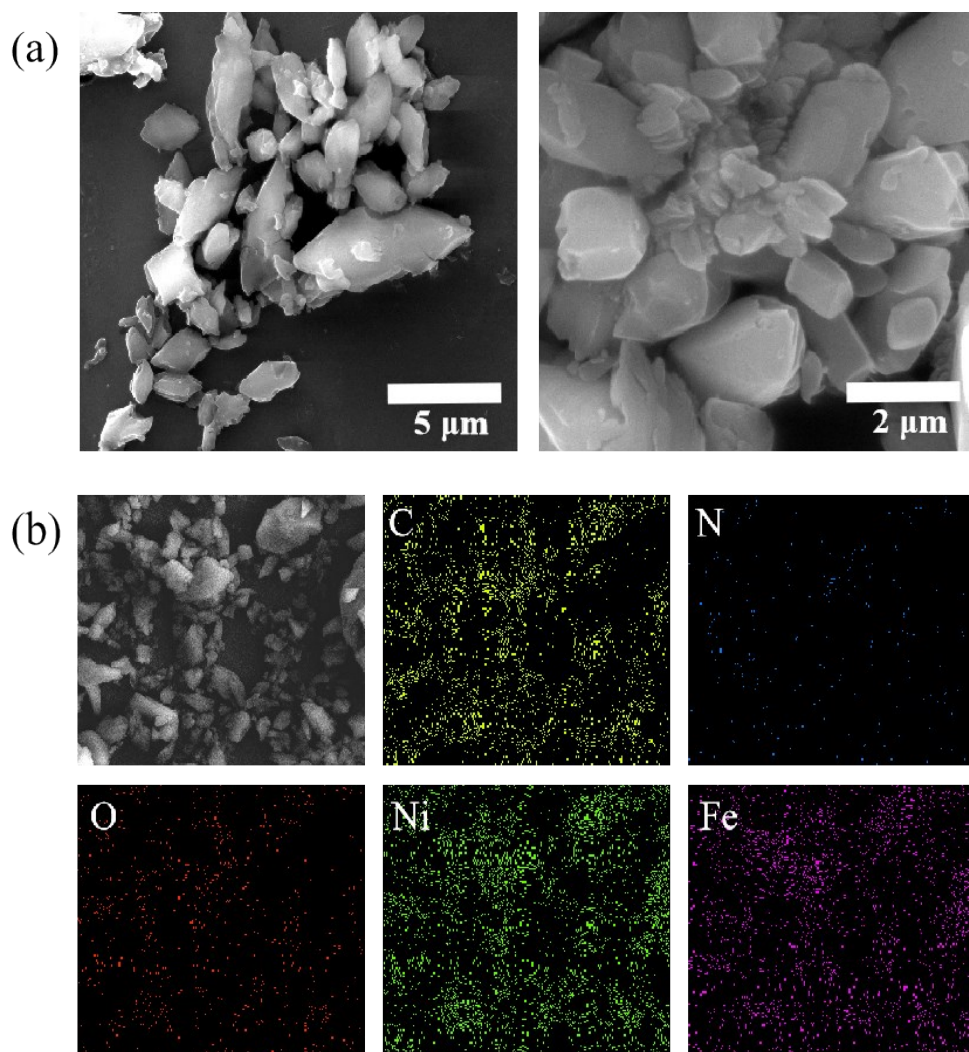

**Figure S8.** (a) SEM images of  $\text{Ni}_2\text{Fe}_1\text{-MOF}$ . (b) SEM-EDS mapping images of  $\text{Ni}_2\text{Fe}_1\text{-MOF}$ .

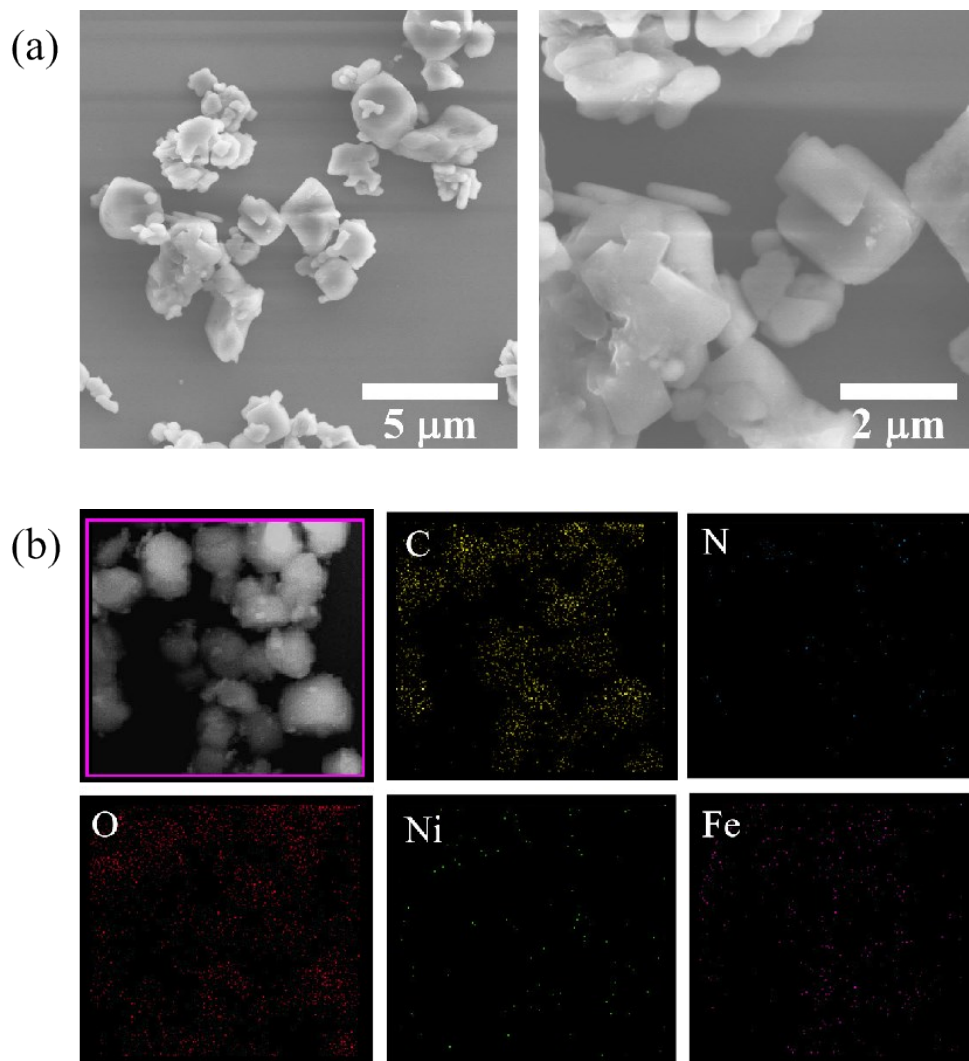

**Figure S9.** (a) SEM images of  $\text{Ni}_1\text{Fe}_2\text{-MOF}$ . (b) SEM-EDS mapping images of  $\text{Ni}_1\text{Fe}_2\text{-MOF}$ .

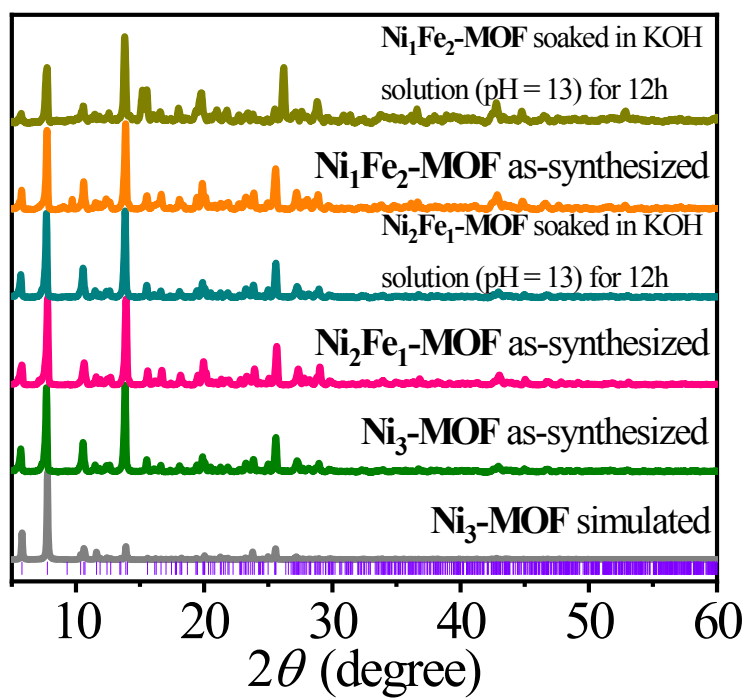

**Figure S10.** PXRD patterns of  $\text{Ni}_3(1-x)\text{Fe}_{3x}\text{-MOF}$  in 0.1 M KOH solution (pH = 13).

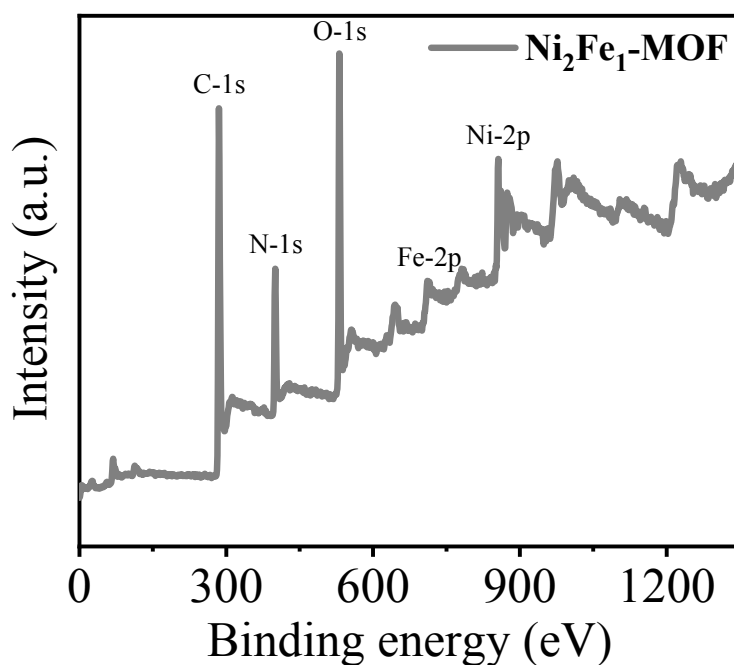

**Figure S11.** XPS summary spectra of  $\text{Ni}_2\text{Fe}_1\text{-MOF}$ .



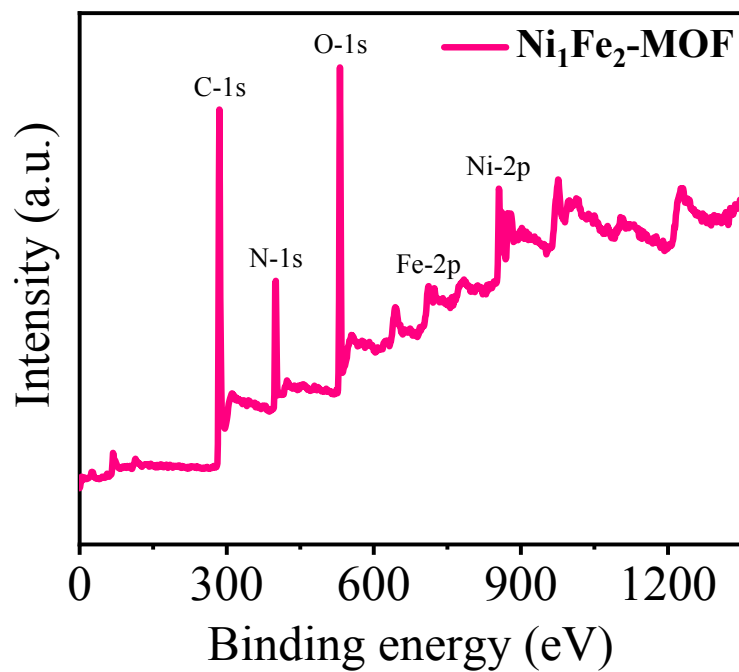

**Figure S12.** XPS summary spectra of  $\text{Ni}_1\text{Fe}_2\text{-MOF}$ .

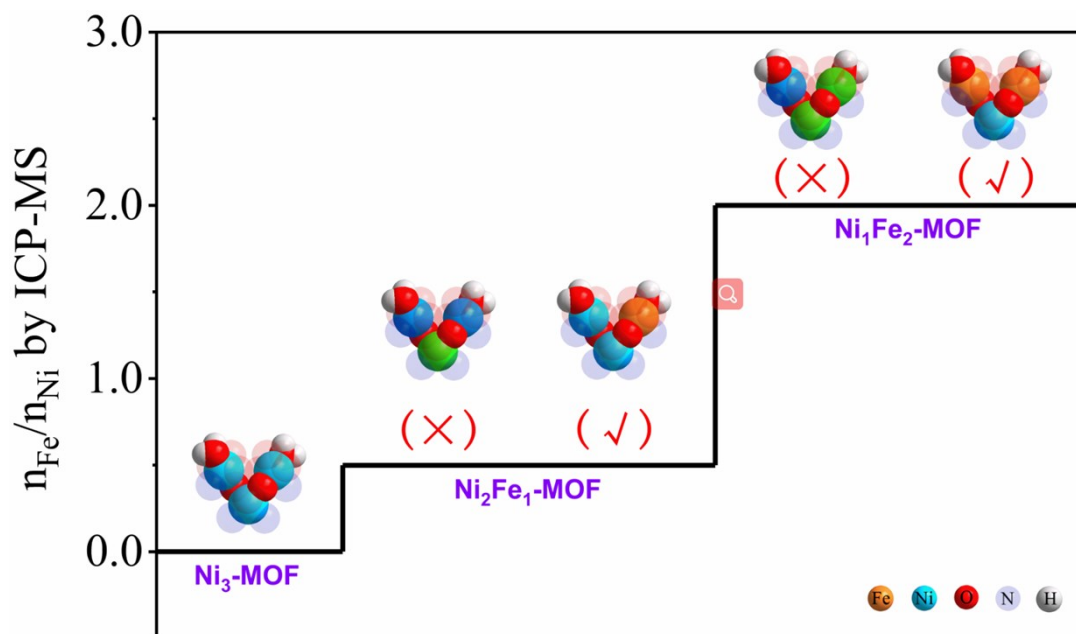

**Figure S13.** The diagram of V-shaped tri-nuclear cluster in  $\text{Ni}_{3(1-x)}\text{Fe}_{3x}\text{-MOF}$  ( $x = 0, 0.33, 0.67$ ).

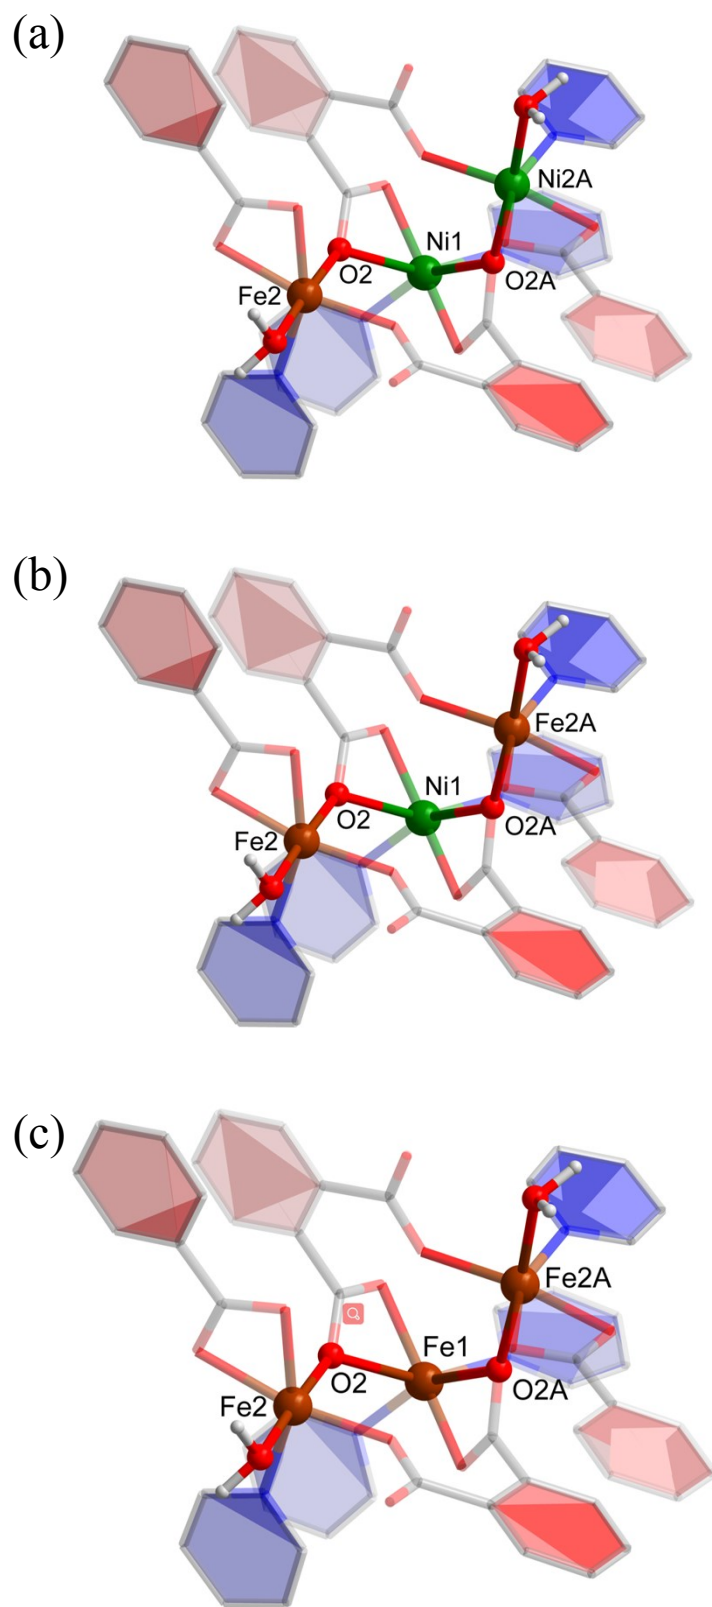

**Figure S14.** Coordination environment of V-shaped trinuclear clusters in the (a)  $\text{Fe}_1$ -MOF, (b)  $\text{Ni}_1\text{Fe}_2$ -MOF and (c)  $\text{NiFe}_3$ -MOF.

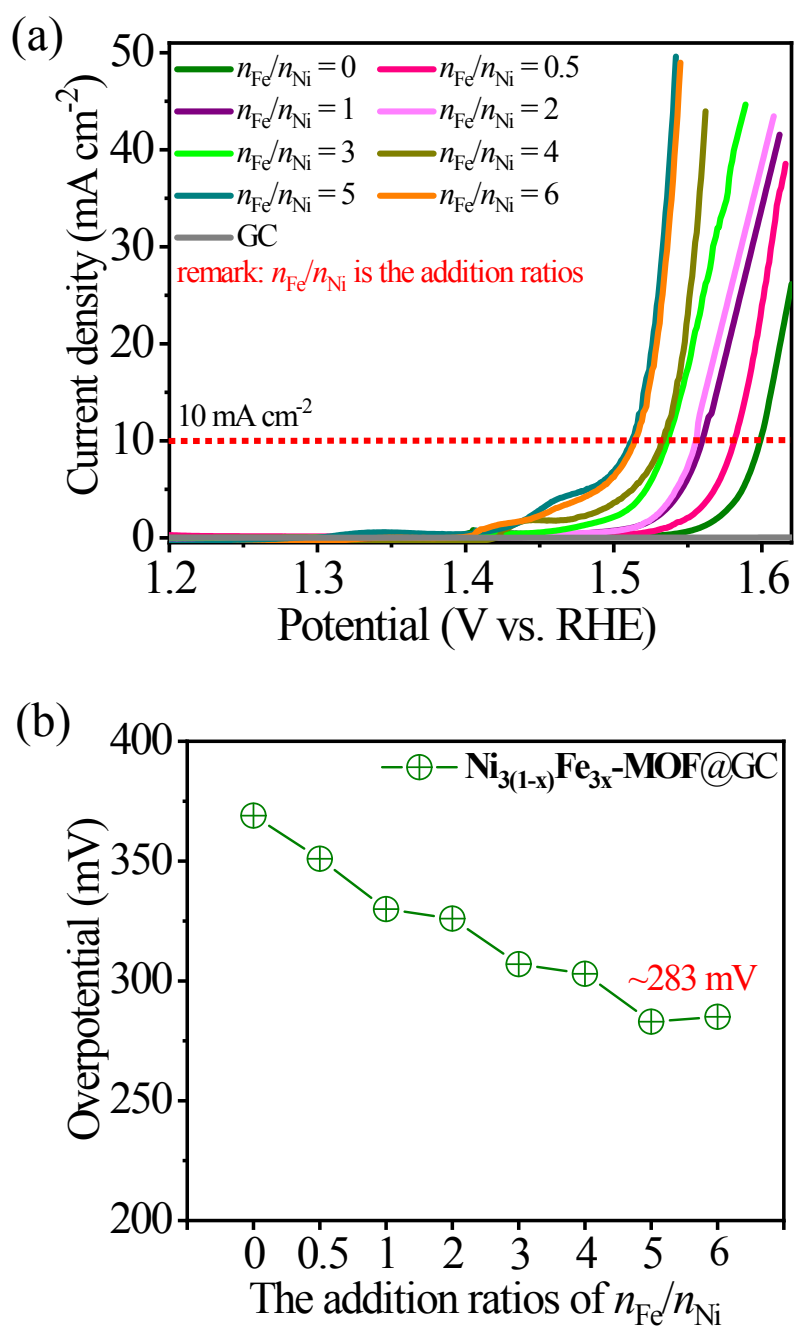

**Figure S15.** (a) LSV OER curves and (b) the corresponding  $\eta_{\text{OER-10}}$  of  $\text{Ni}_{3(1-x)}\text{Fe}_{3x}\text{-MOF@GC}$  in 0.1m KOH solution (pH 13).

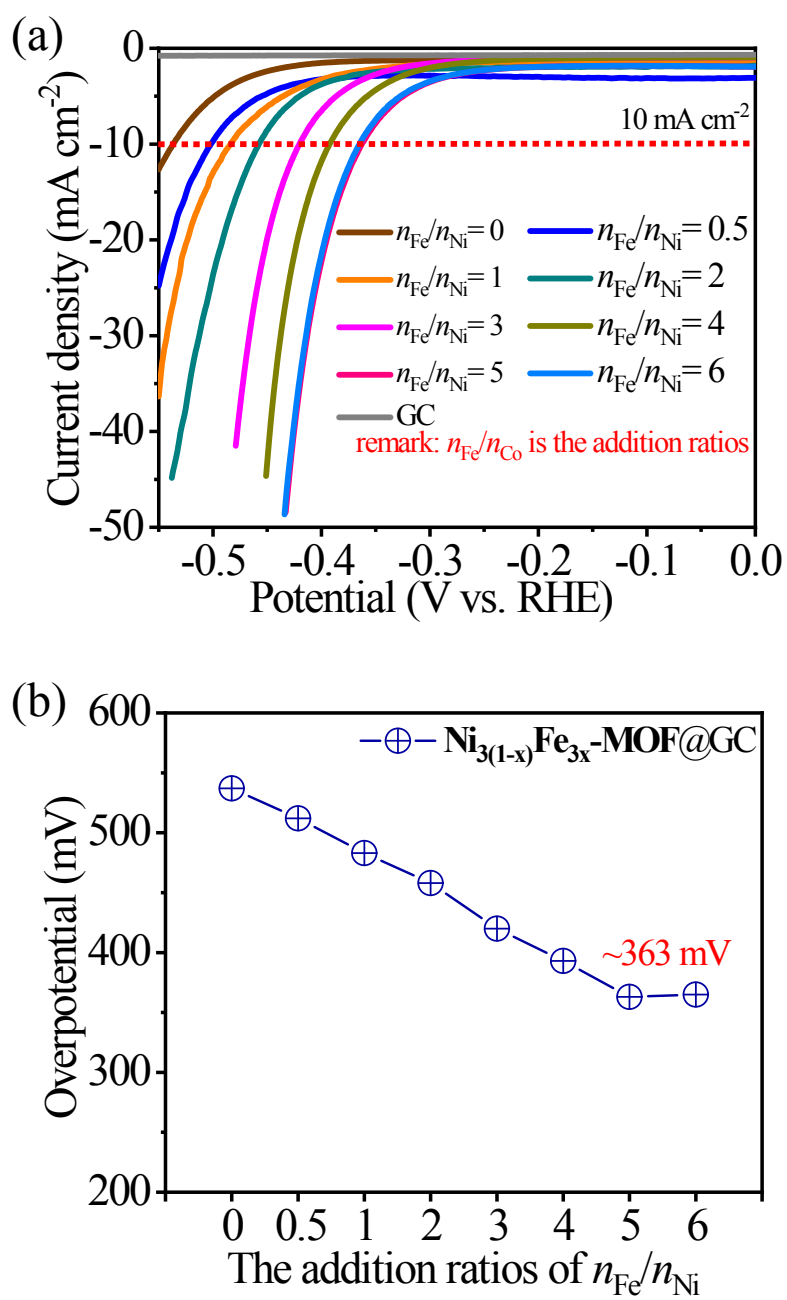

**Figure S16.** (a) LSV HER curves and (b) the corresponding  $\eta_{\text{HER-10}}$  of  $\text{Ni}_{3(1-x)}\text{Fe}_{3x}\text{-MOF@GC}$  in 0.1M KOH solution (pH 13).

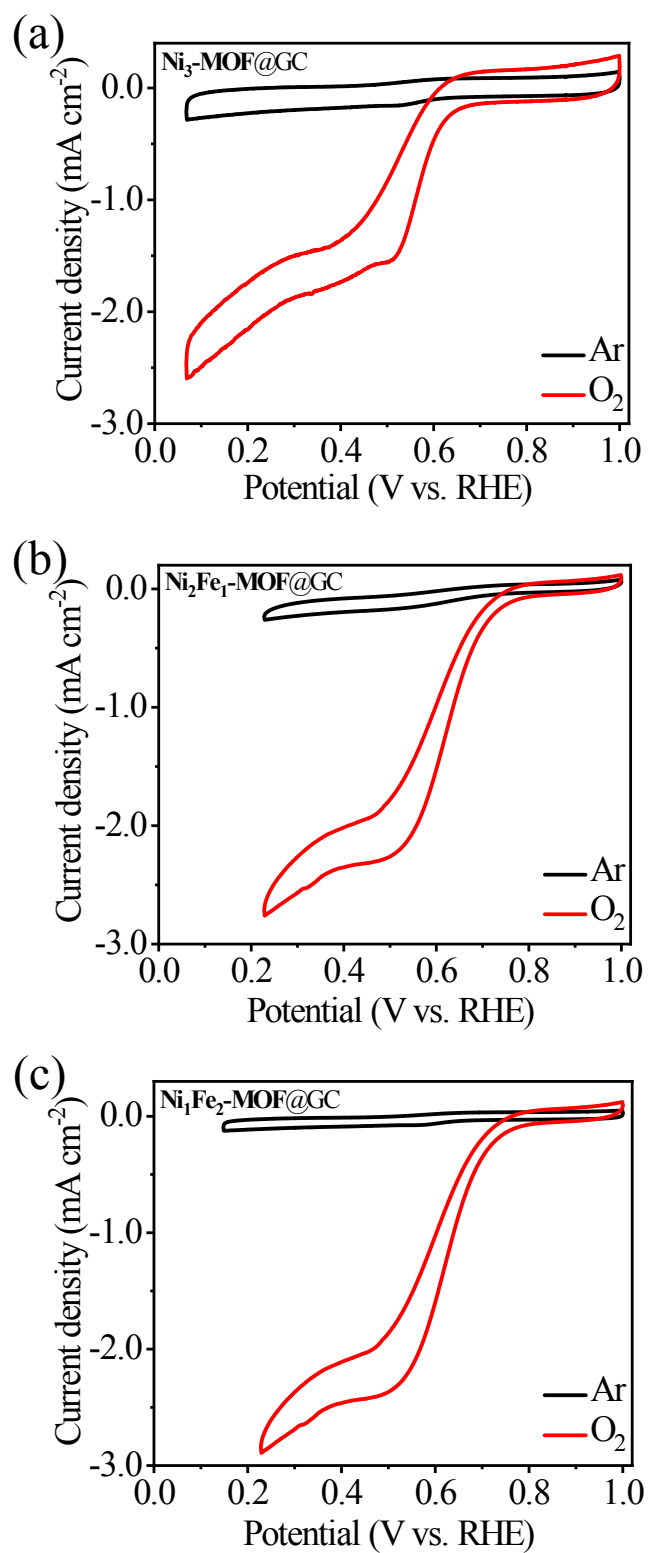

**Figure S17.** CV curve of (a) Ni<sub>3</sub>-MOF@GC, (b) Ni<sub>2</sub>Fe<sub>1</sub>-MOF@GC, and (c) Ni<sub>1</sub>Fe<sub>2</sub>-MOF@GC in O<sub>2</sub>-saturated/Ar-saturated 0.1 M KOH solution.

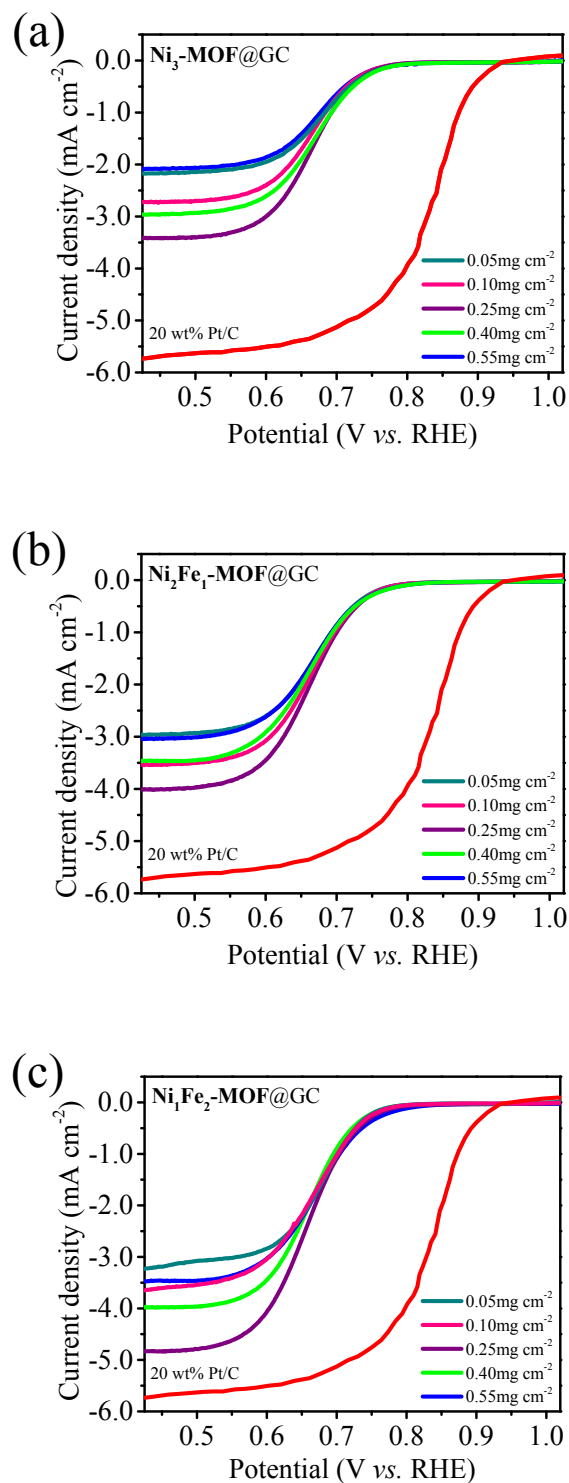

**Figure S18.** LSV curves at different mass loading of (a) **Ni<sub>3</sub>-MOF@GC**, (b) **Ni<sub>2</sub>Fe<sub>1</sub>-MOF@GC**, and (c) **Ni<sub>1</sub>Fe<sub>2</sub>-MOF@GC** at 2500 r.p.m. in O<sub>2</sub>-saturated 0.1 M. The LSV curves of 20% Pt/C refer to *Nat. Energy* **2016**, *1*, 15006.

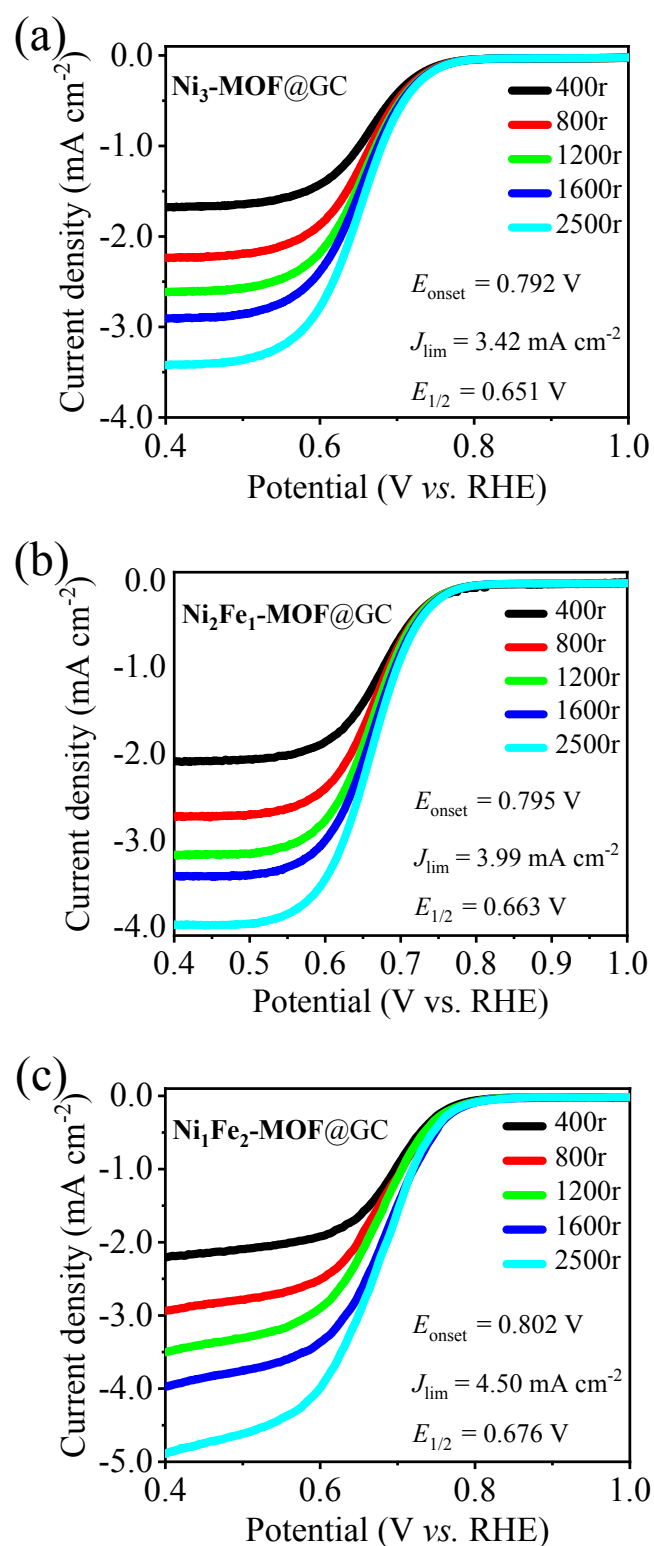

**Figure S19.** LSV curves at different rotation rates (r.p.m.) of (a) **Ni<sub>3</sub>-MOF@GC**, (b) **Ni<sub>2</sub>Fe<sub>1</sub>-MOF@GC**, and (c) **Ni<sub>1</sub>Fe<sub>2</sub>-MOF@GC** in O<sub>2</sub>-saturated 0.1 M KOH solution.

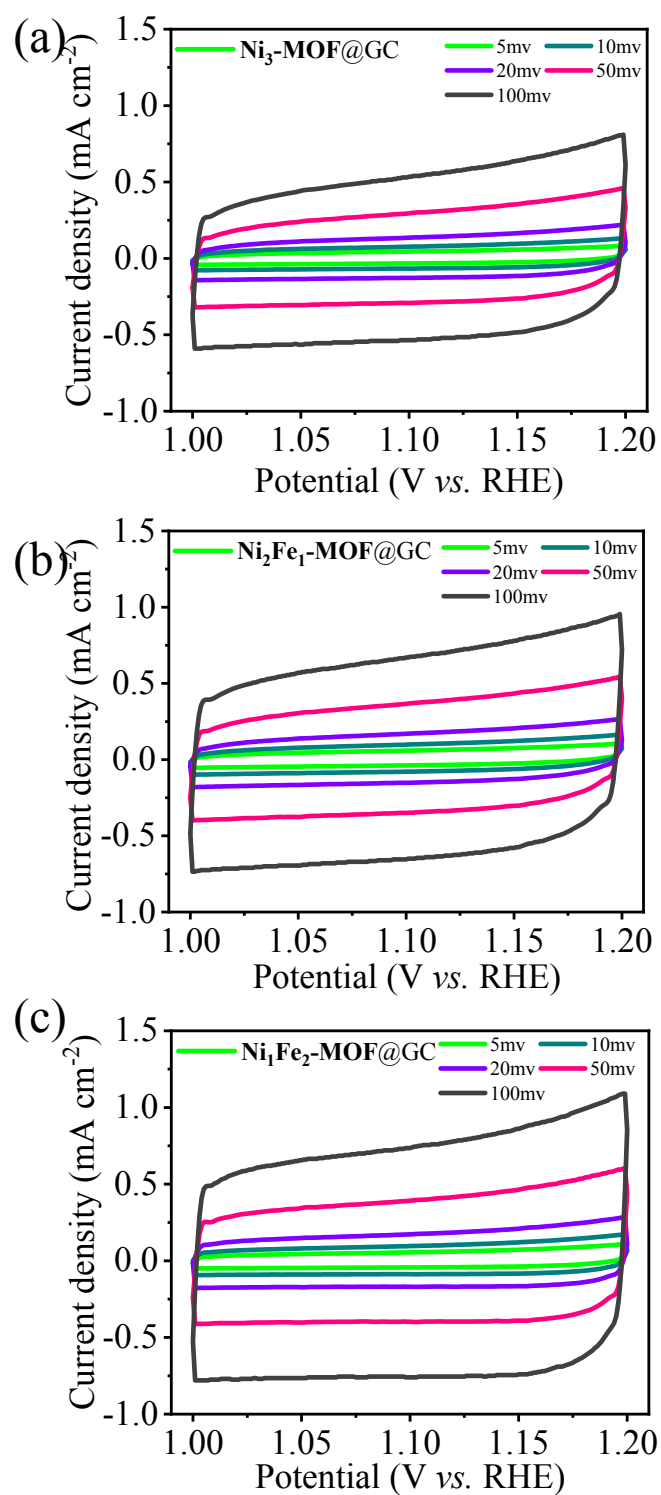

**Figure S20.** CV curves of in double layer region at scan rates of 5 mV s<sup>-1</sup>, 10 mV s<sup>-1</sup>, 20 mV s<sup>-1</sup>, 50 mV s<sup>-1</sup> and 100 mV s<sup>-1</sup> of (a) Ni<sub>3</sub>-MOF@GC, (b) Ni<sub>2</sub>Fe<sub>1</sub>-MOF@GC, and (c) Ni<sub>1</sub>Fe<sub>2</sub>-MOF@GC.



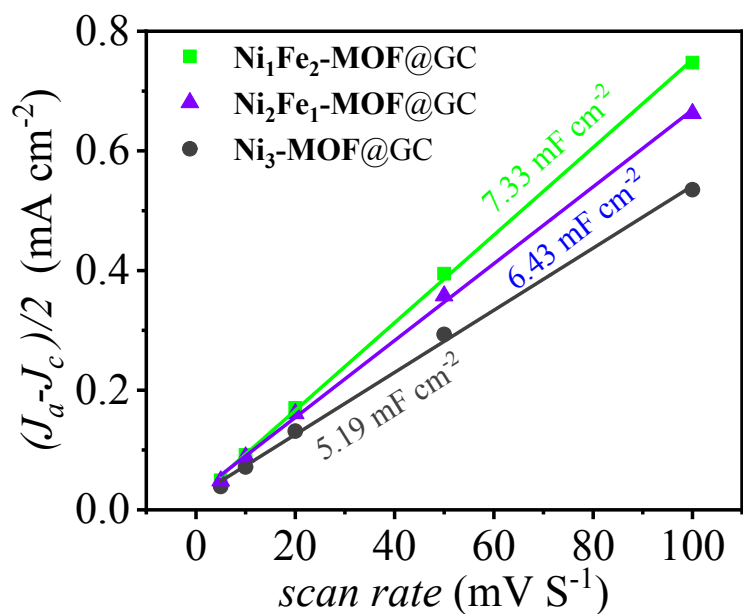

**Figure S21.** Current density as a function of the scan rate for Ni<sub>3</sub>-MOF@GC, Ni<sub>2</sub>Fe<sub>1</sub>-MOF@GC, and Ni<sub>1</sub>Fe<sub>2</sub>-MOF@GC, used to indicate the electrochemically active surface area.

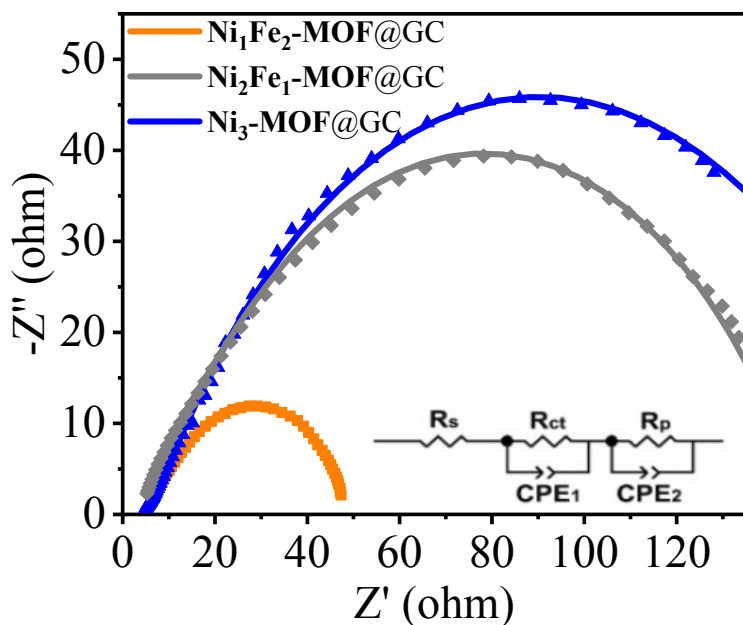

**Figure S22.** Nyquist plots of Ni<sub>3</sub>-MOF@GC, Ni<sub>2</sub>Fe<sub>1</sub>-MOF@GC, and Ni<sub>1</sub>Fe<sub>2</sub>-MOF@GC.

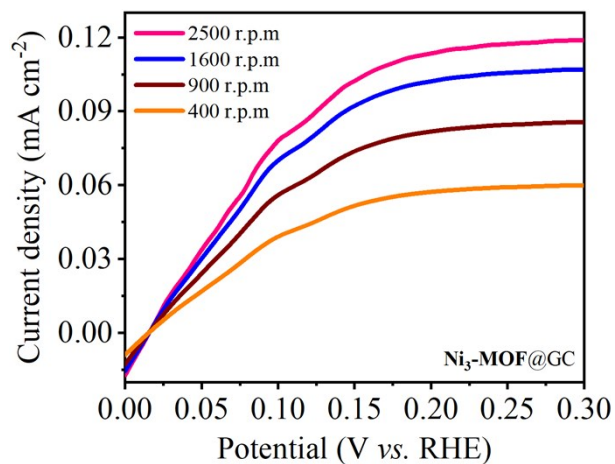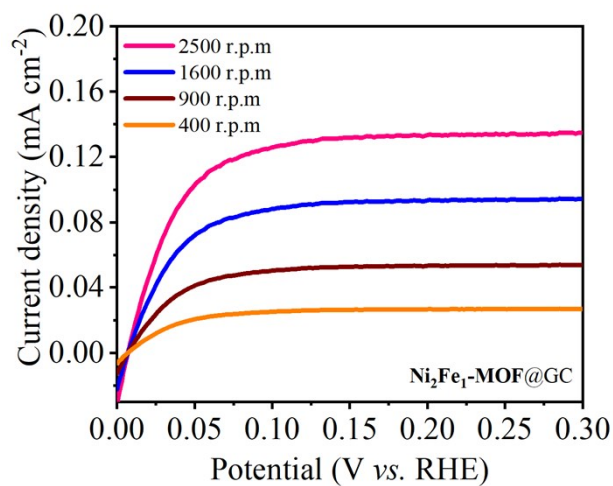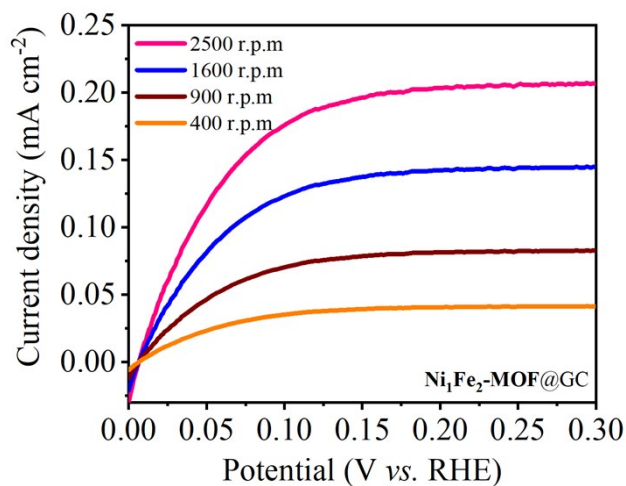

**Figure S23.** LSV curves at different rotation rates (r.p.m.) of (a) Ni<sub>3</sub>-MOF@GC, (b) Ni<sub>2</sub>Fe<sub>1</sub>-MOF@GC, and (c) Ni<sub>1</sub>Fe<sub>2</sub>-MOF@GC in H<sub>2</sub>-saturated 0.1 M KOH solution.

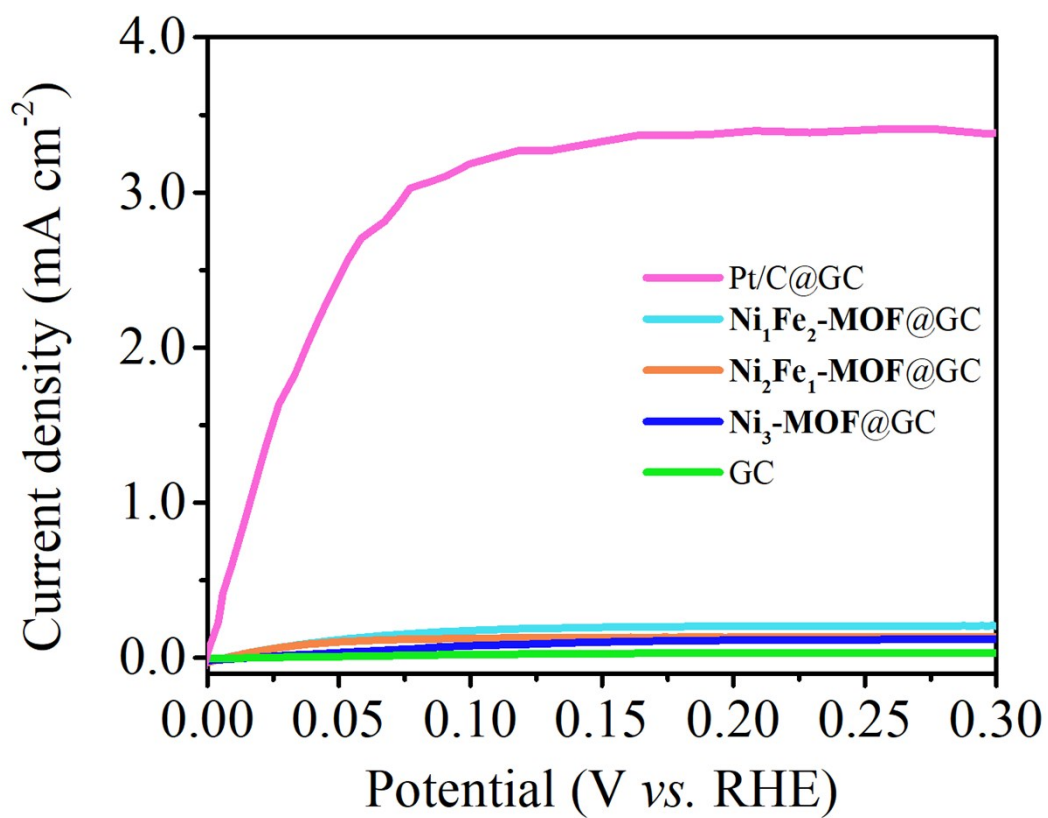

**Figure S24.** LSV curves at 2500 r.p.m. of Ni<sub>3</sub>-MOF@GC, Ni<sub>2</sub>Fe<sub>1</sub>-MOF@GC, Ni<sub>1</sub>Fe<sub>2</sub>-MOF@GC and 20% Pt/C refer to *Angew. Chem. Int. Ed.* **2019**, *58*, 7445.

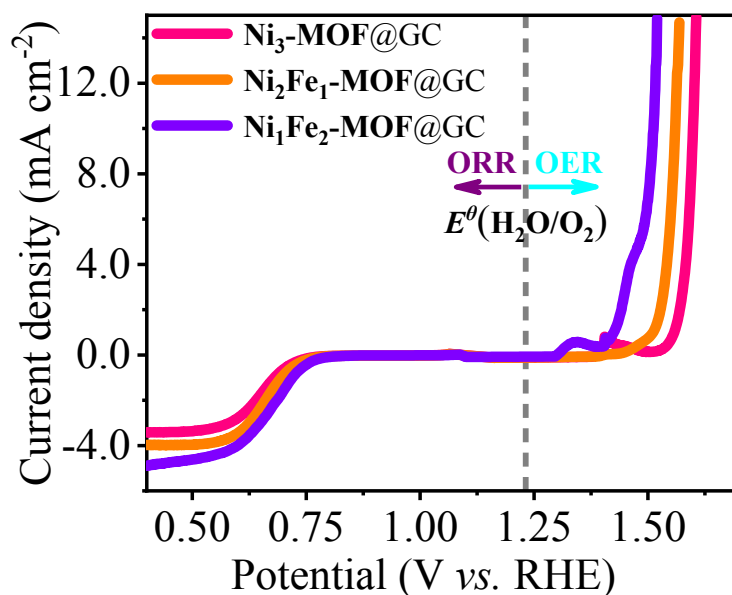

**Figure S25.** LSV OER/ORR curves of Ni<sub>3</sub> -MOF@GC, Ni<sub>2</sub>Fe<sub>1</sub> -MOF@GC and Ni<sub>1</sub>Fe<sub>2</sub> -MOF@GC in 0.1m KOH solution (pH 13).

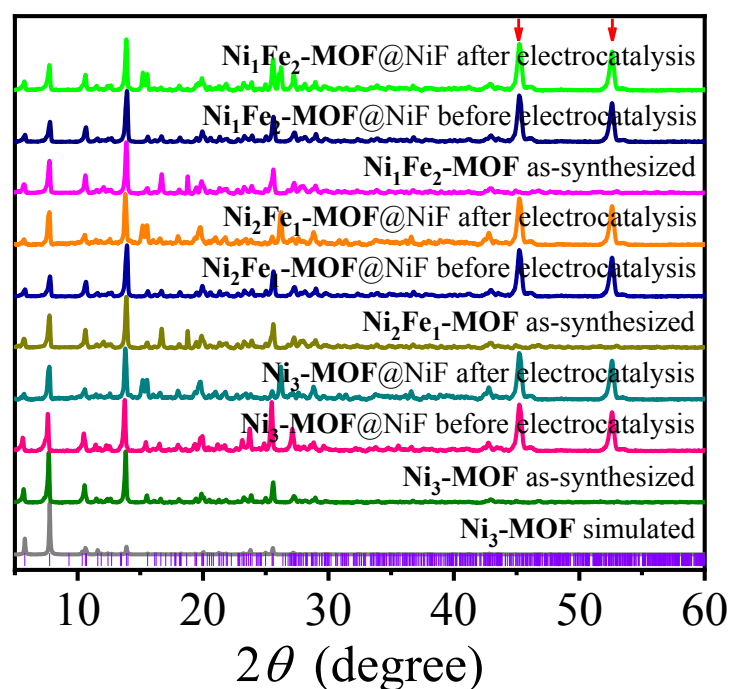

**Figure S26.** PXRD patterns of Ni<sub>3</sub>-MOF@NiF, Ni<sub>2</sub>Fe<sub>1</sub>-MOF@NiF and Ni<sub>1</sub>Fe<sub>2</sub>-MOF@NiF before and after electrocatalysis testing (arrows indicate the characteristic diffraction peaks of Ni).

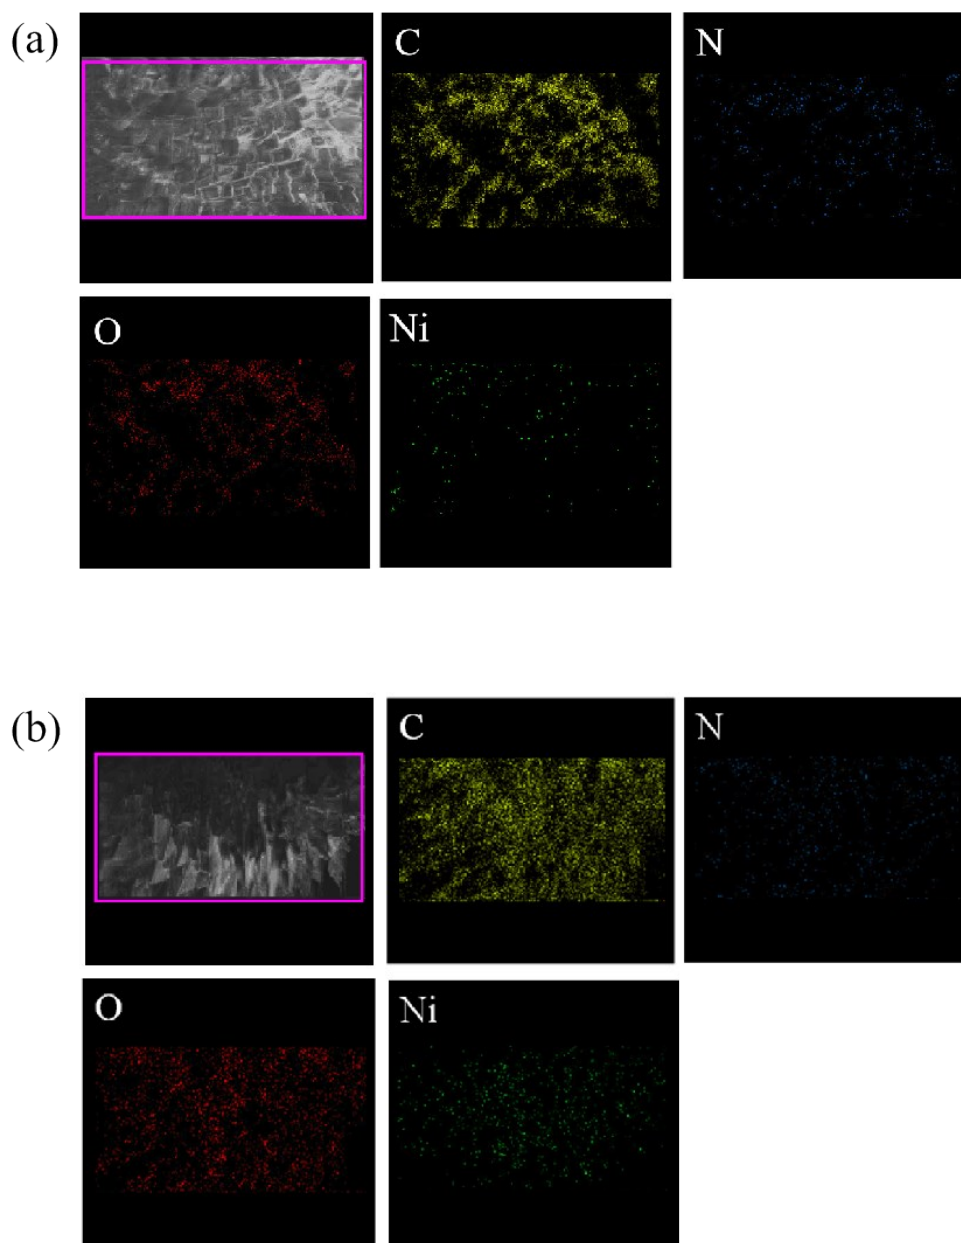

**Figure S27.** SEM-EDS mapping images of  $\text{Ni}_3\text{-MOF@NiF}$  (a) before (b) after electrocatalysis testing.

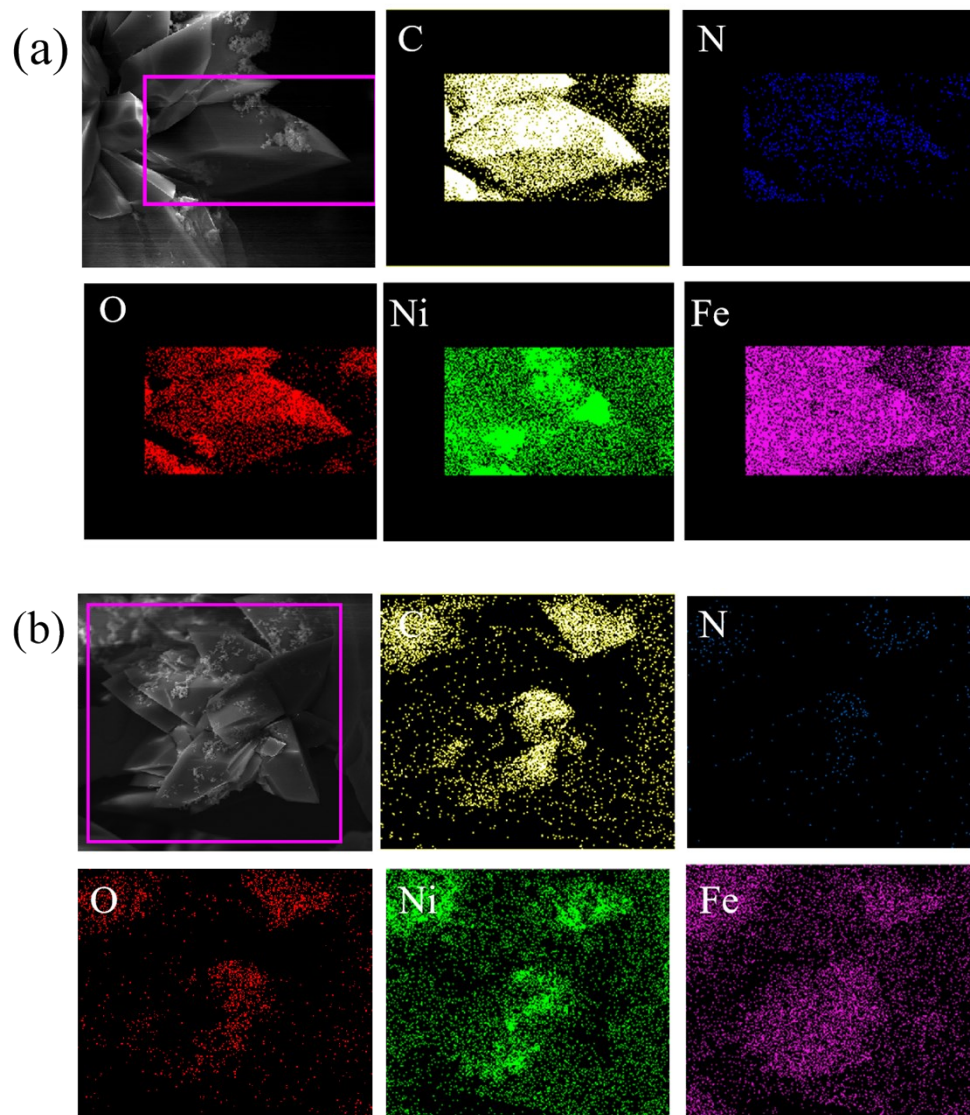

**Figure S28.** SEM-EDS mapping images of  $\text{Ni}_2\text{Fe}_1\text{-MOF@NiF}$  (a) before (b) after electrocatalysis testing.

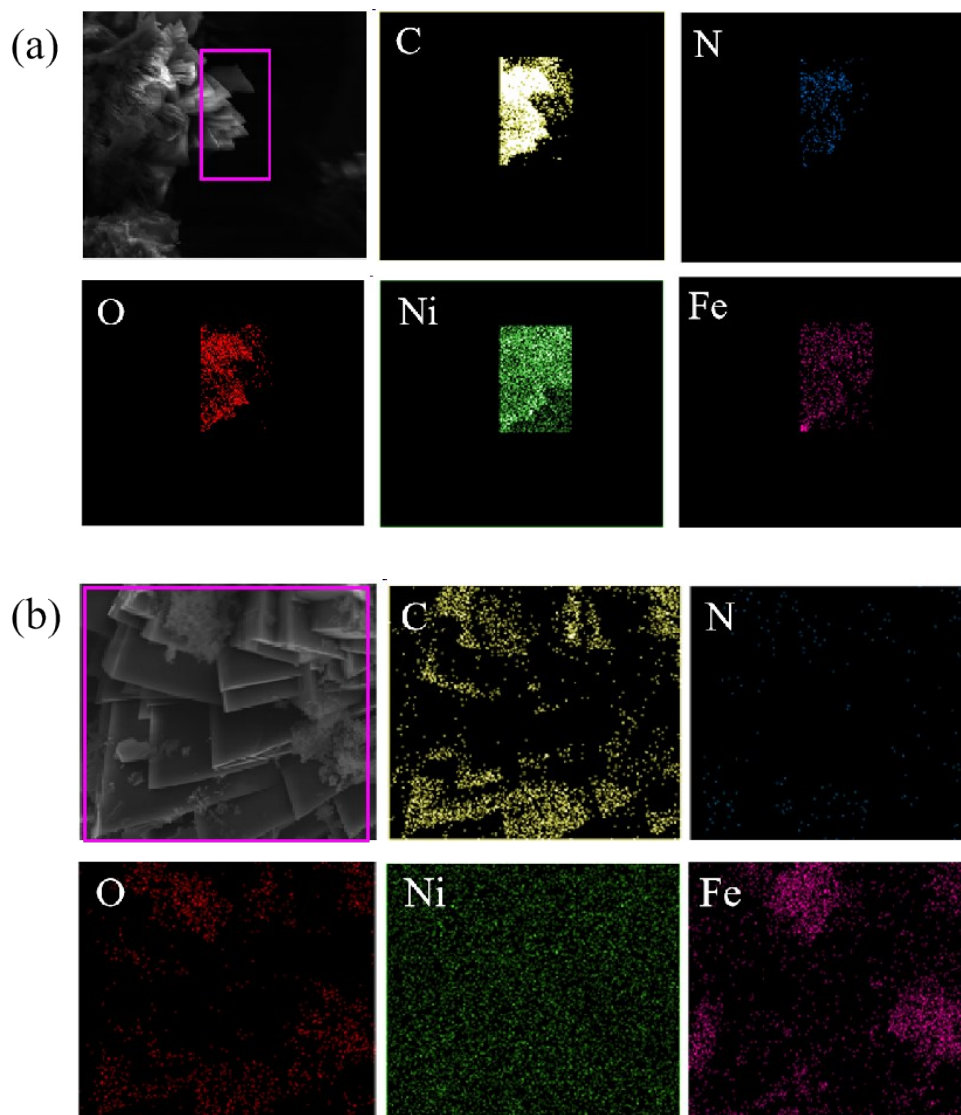

**Figure S29.** SEM-EDS mapping images of  $\text{Ni}_1\text{Fe}_2\text{-MOF@NiF}$  (a) before (b) after electrocatalysis testing.

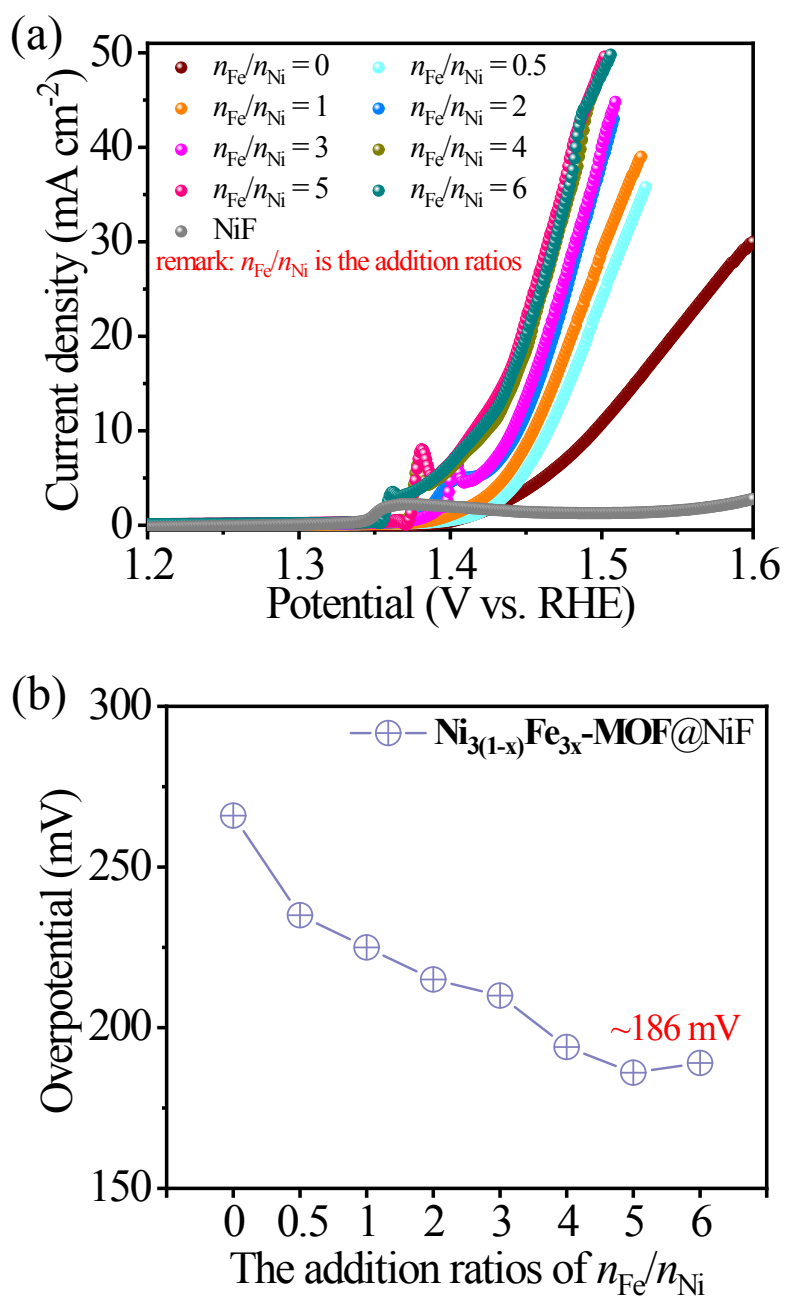

**Figure S30.** (a) LSV OER curves and (b) the corresponding  $\eta_{\text{OER-10}}$  of  $\text{Ni}_{3(1-x)}\text{Fe}_{3x}\text{-MOF@NiF}$  in 0.1M KOH solution (pH 13).



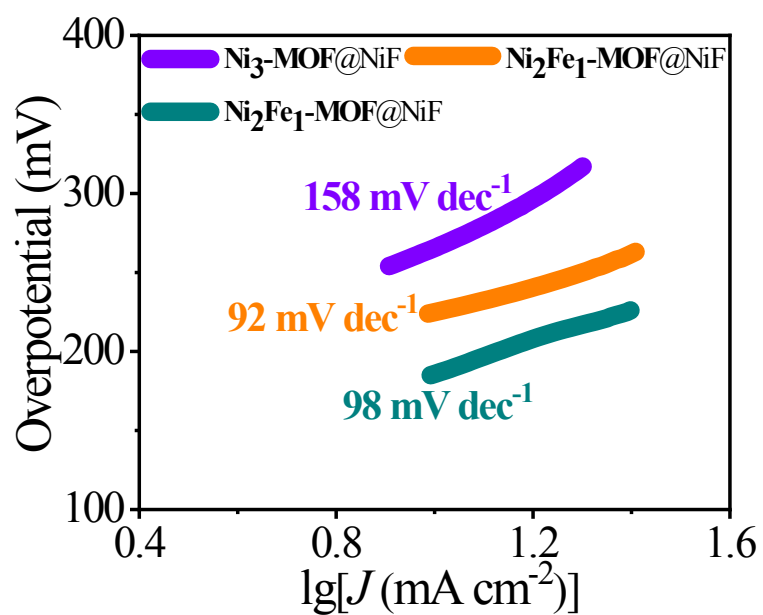

**Figure S31.** The OER Tafel plots of  $\text{Ni}_3\text{-MOF@NiF}$ ,  $\text{Ni}_2\text{Fe}_1\text{-MOF@NiF}$  and  $\text{Ni}_1\text{Fe}_2\text{-MOF@NiF}$ .

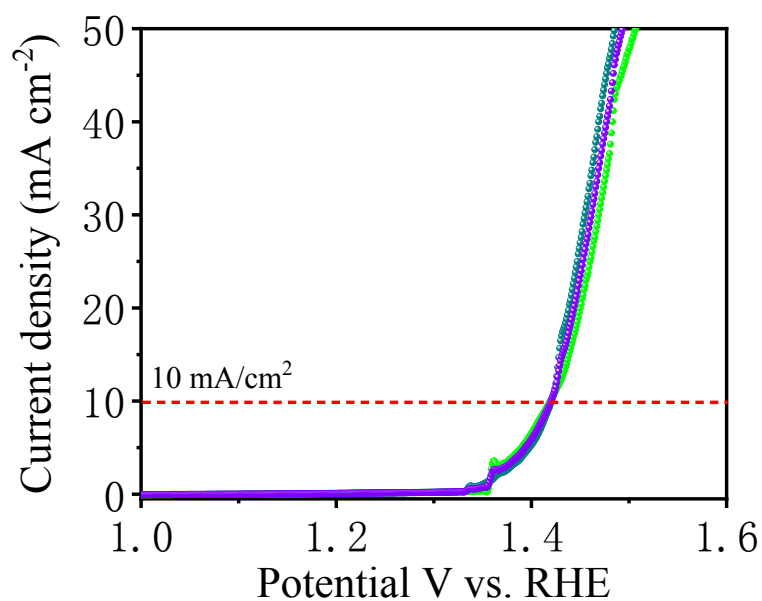

**Figure S32.** LSV OER curve of  $\text{Ni}_1\text{Fe}_2\text{-MOF@NiF}$  repeated three times in 0.1M KOH solution (pH 13).

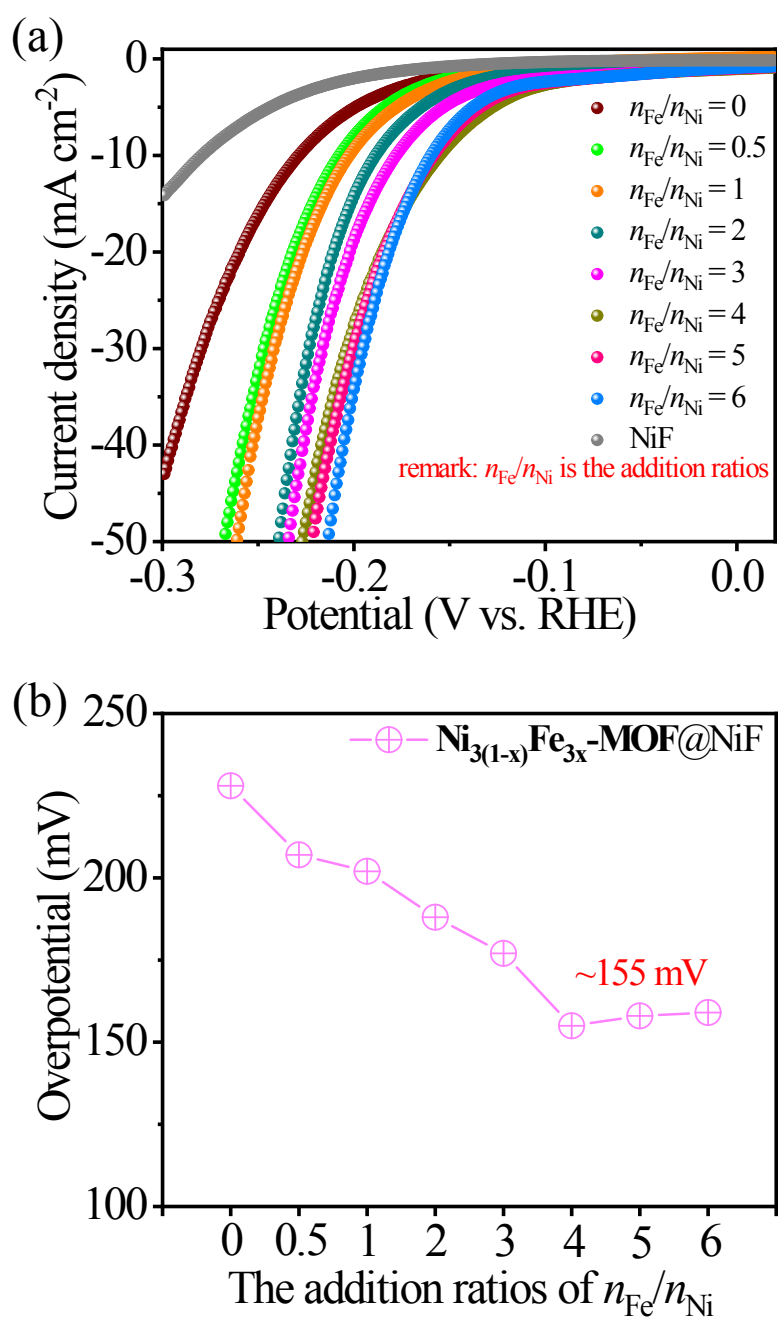

**Figure S33.** (a) LSV HER curves and (b) the corresponding  $\eta_{\text{HER-10}}$  of  $\text{Ni}_{3(1-x)}\text{Fe}_{3x}\text{-MOF@NiF}$  in 0.1m KOH solution (pH 13).

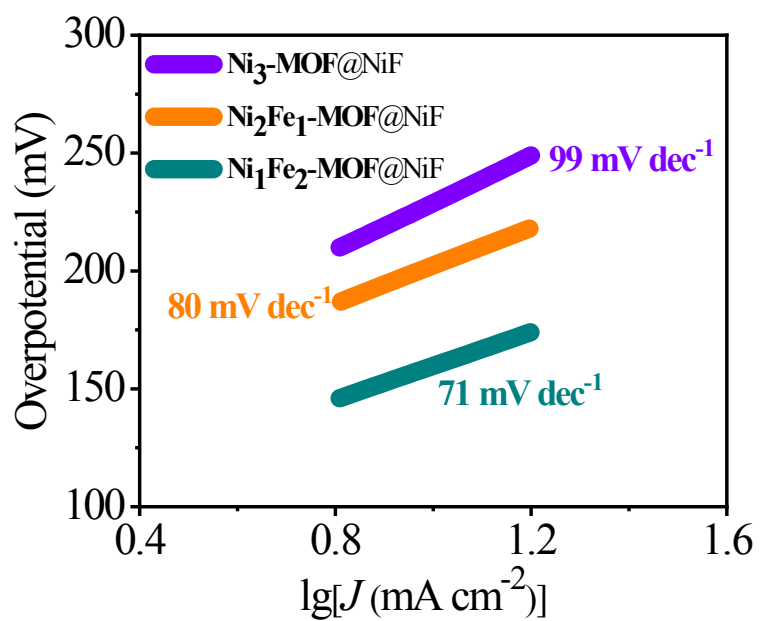

**Figure S34.** The HER Tafel plots of  $\text{Ni}_3\text{-MOF@NiF}$ ,  $\text{Ni}_2\text{Fe}_1\text{-MOF@NiF}$  and  $\text{Ni}_1\text{Fe}_2\text{-MOF@NiF}$ .

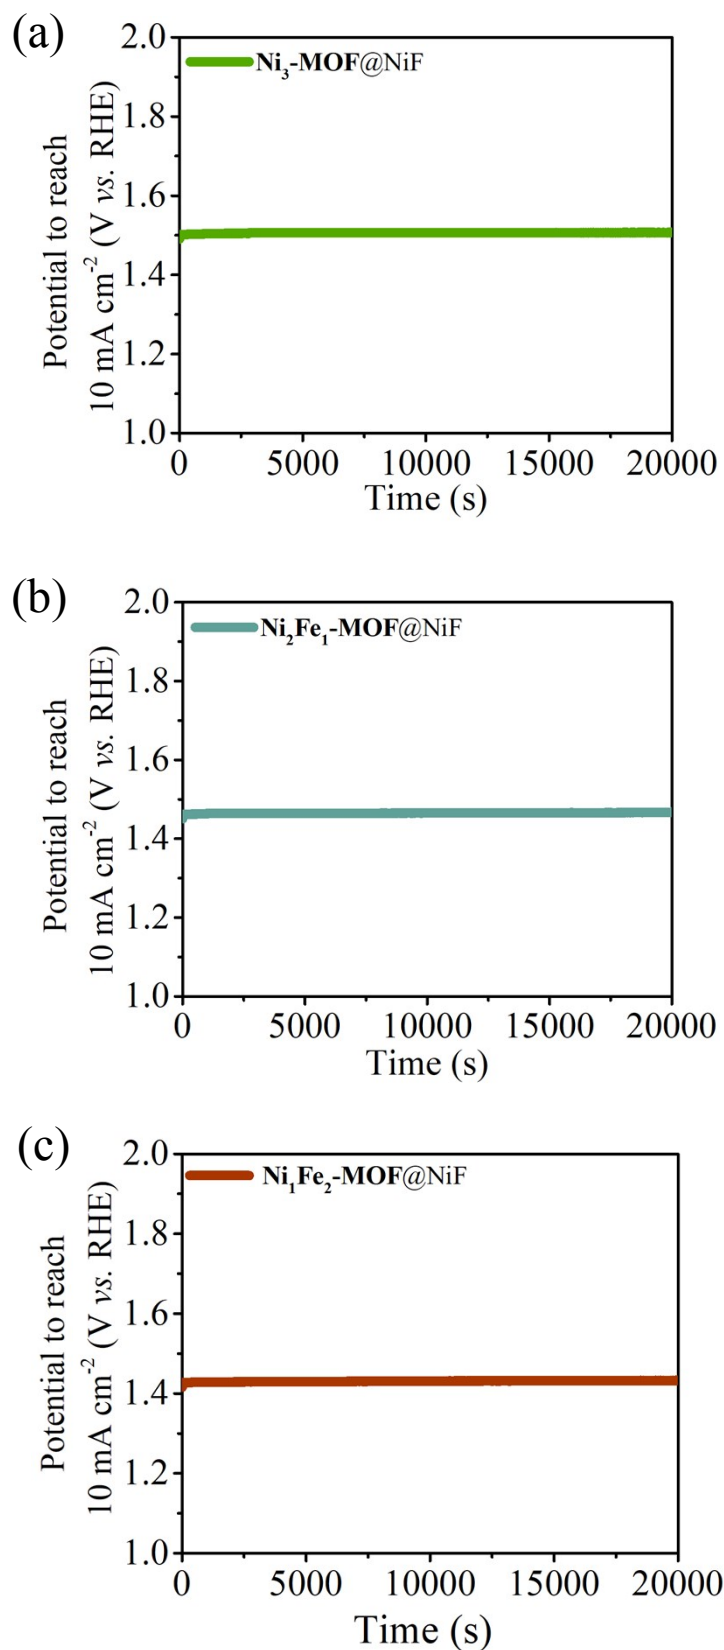

**Figure S35.** The OER chronopotentiometry curves of (a) **Ni<sub>3</sub>-MOF@NiF**, (b) **Ni<sub>2</sub>Fe<sub>1</sub>-MOF@NiF**, and (c) **Ni<sub>1</sub>Fe<sub>2</sub>-MOF@NiF** in 0.1M KOH solution (pH 13).

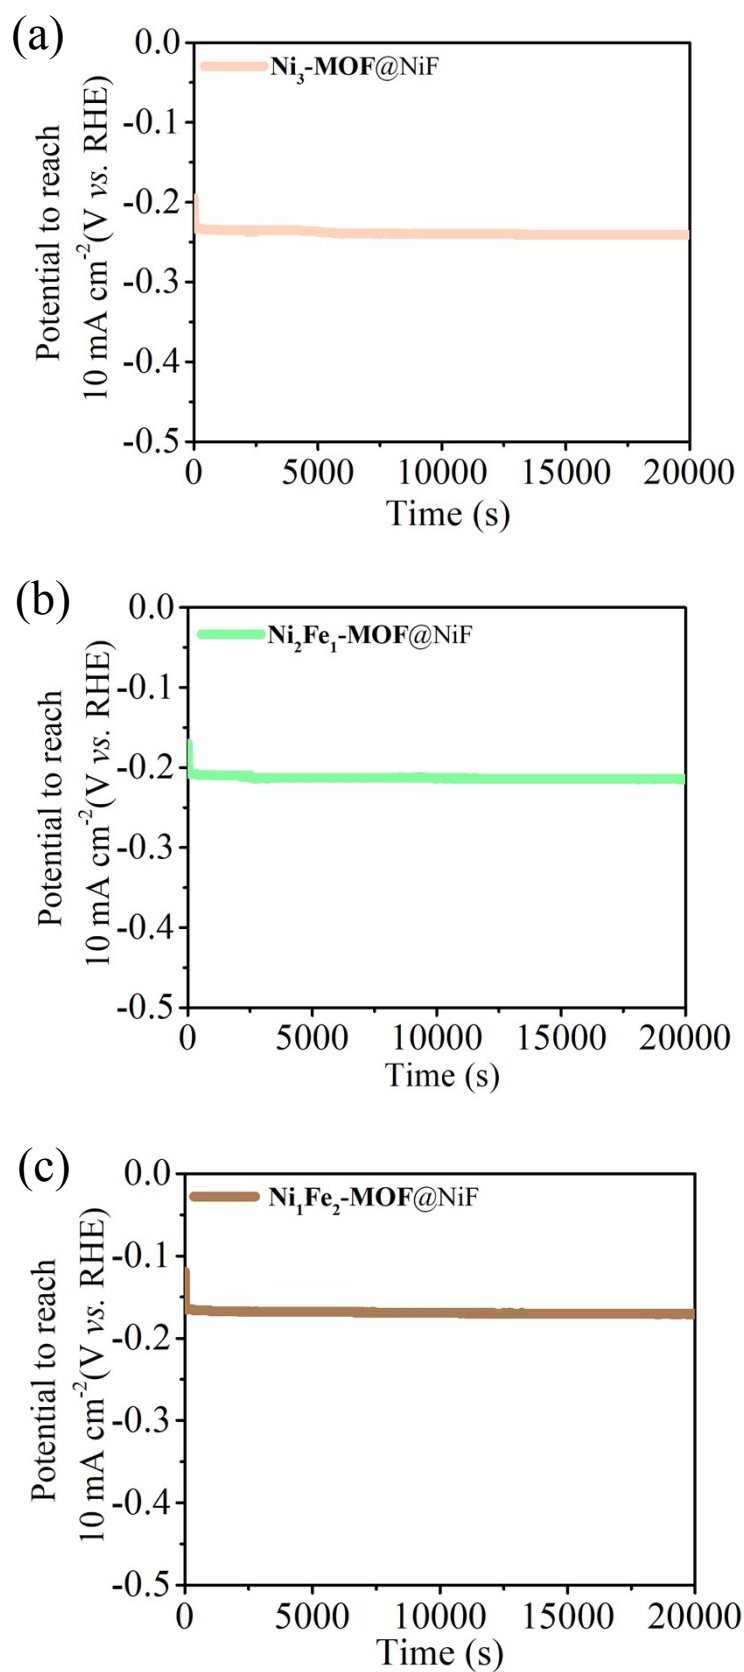

**Figure S36.** The HER chronopotentiometry curves of (a) **Ni<sub>3</sub>-MOF@NiF**, (b) **Ni<sub>2</sub>Fe<sub>1</sub>-MOF@NiF**, and (c) **Ni<sub>1</sub>Fe<sub>2</sub>-MOF@NiF** in 0.1M KOH solution (pH 13).

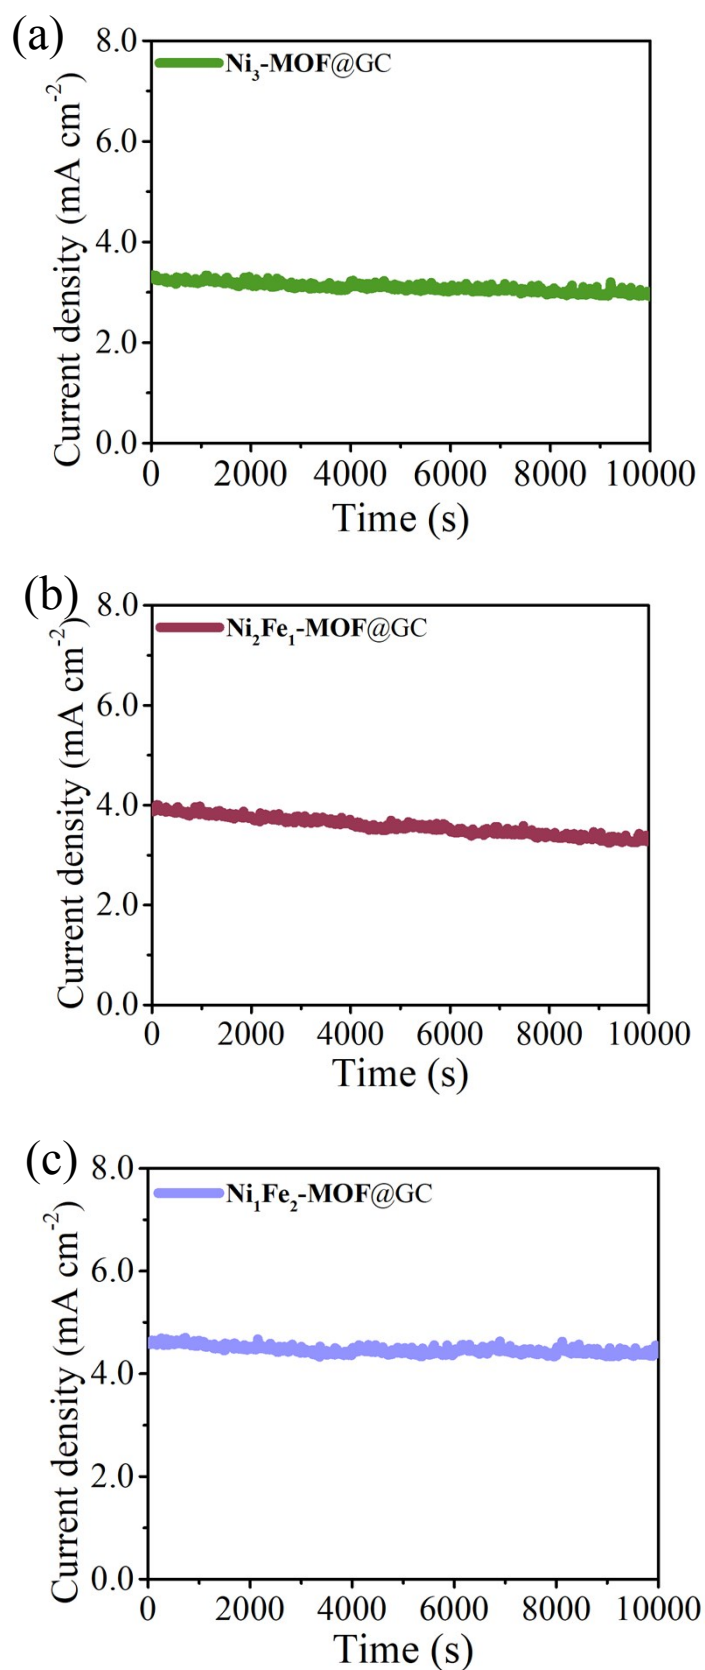

**Figure S37.** The ORR Chronoamperometry curves at the voltage of the electric current density of (a) **Ni<sub>3</sub>-MOF@GC**, (b) **Ni<sub>2</sub>Fe<sub>1</sub>-MOF@GC**, and (c) **Ni<sub>1</sub>Fe<sub>2</sub>-MOF@GC** in 0.1M KOH solution (pH 13).

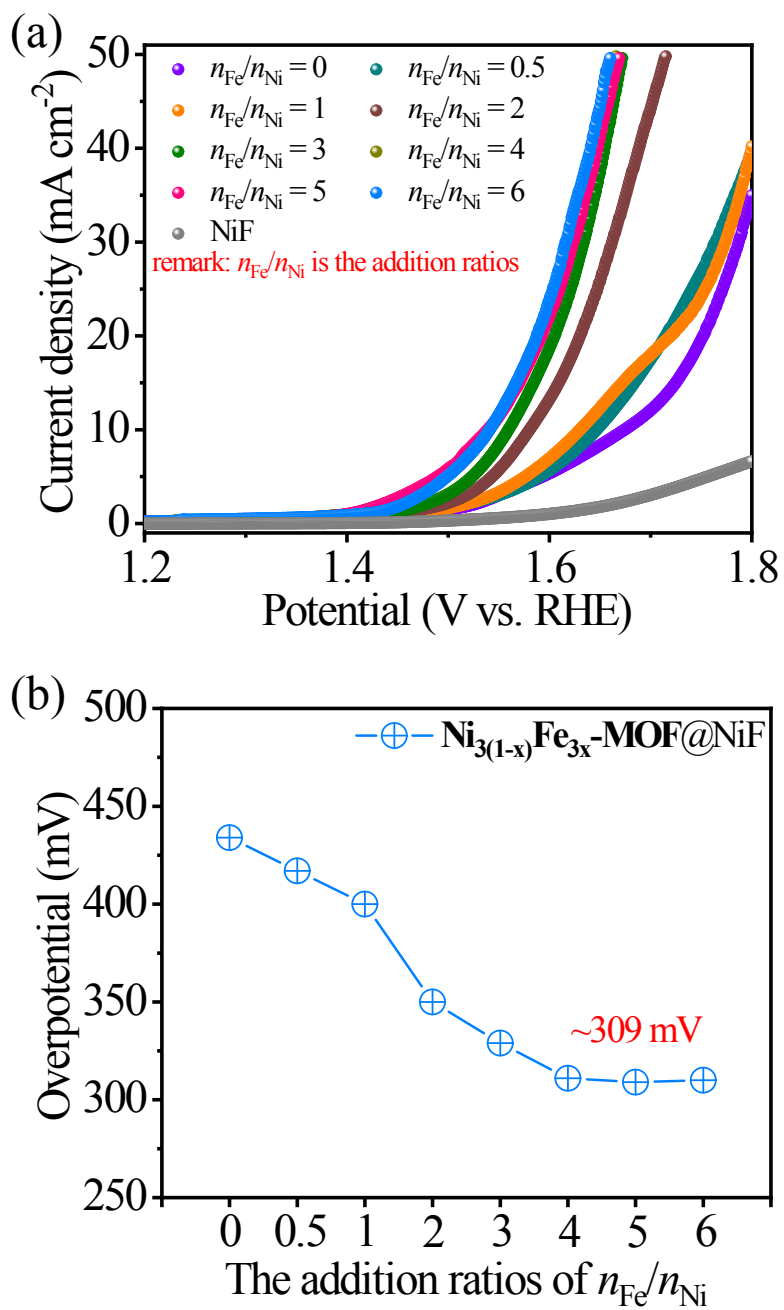

**Figure S38.** (a) LSV overall water splitting curves and (b) the corresponding  $\eta_{\text{overall-10}}$  of  $\text{Ni}_{3(1-x)}\text{Fe}_{3x}\text{-MOF@NiF}$  in 0.1M KOH solution (pH 13).

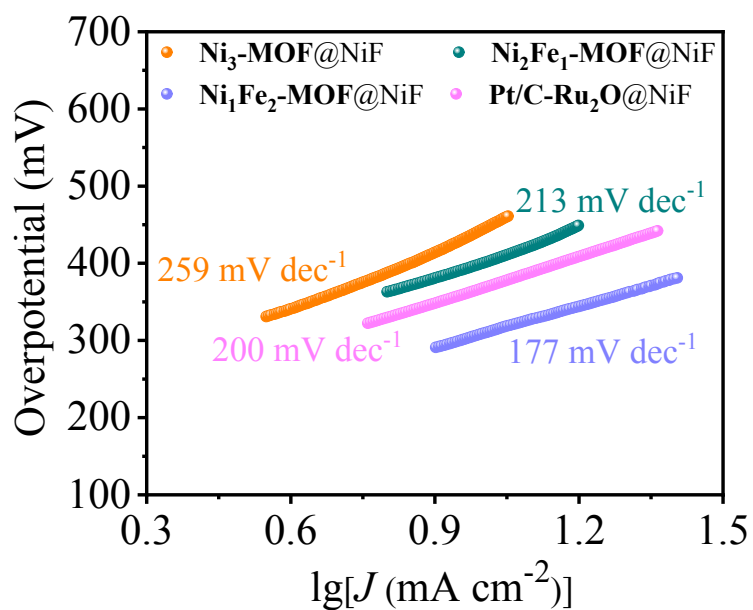

**Figure S39.** The overall water splitting Tafel plots of Ni<sub>3</sub>-MOF@NiF, Ni<sub>2</sub>Fe<sub>1</sub>-MOF@NiF and Ni<sub>1</sub>Fe<sub>2</sub>-MOF@NiF.

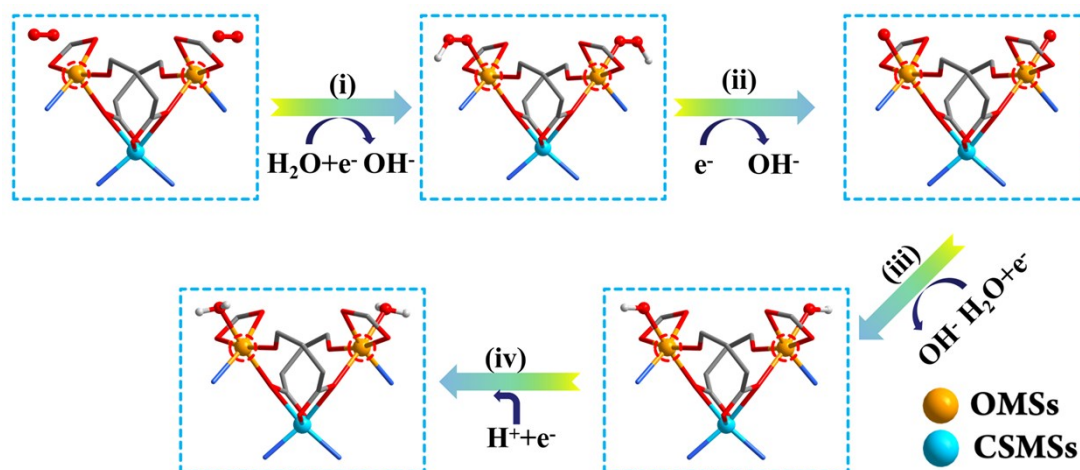

**Figure S40.** Four elementary OER steps on Ni<sub>3(1-x)Fe<sub>3x</sub></sub>-MOF ( $x = 0, 0.33, 0.67$  and 1) determined by DFT calculations.



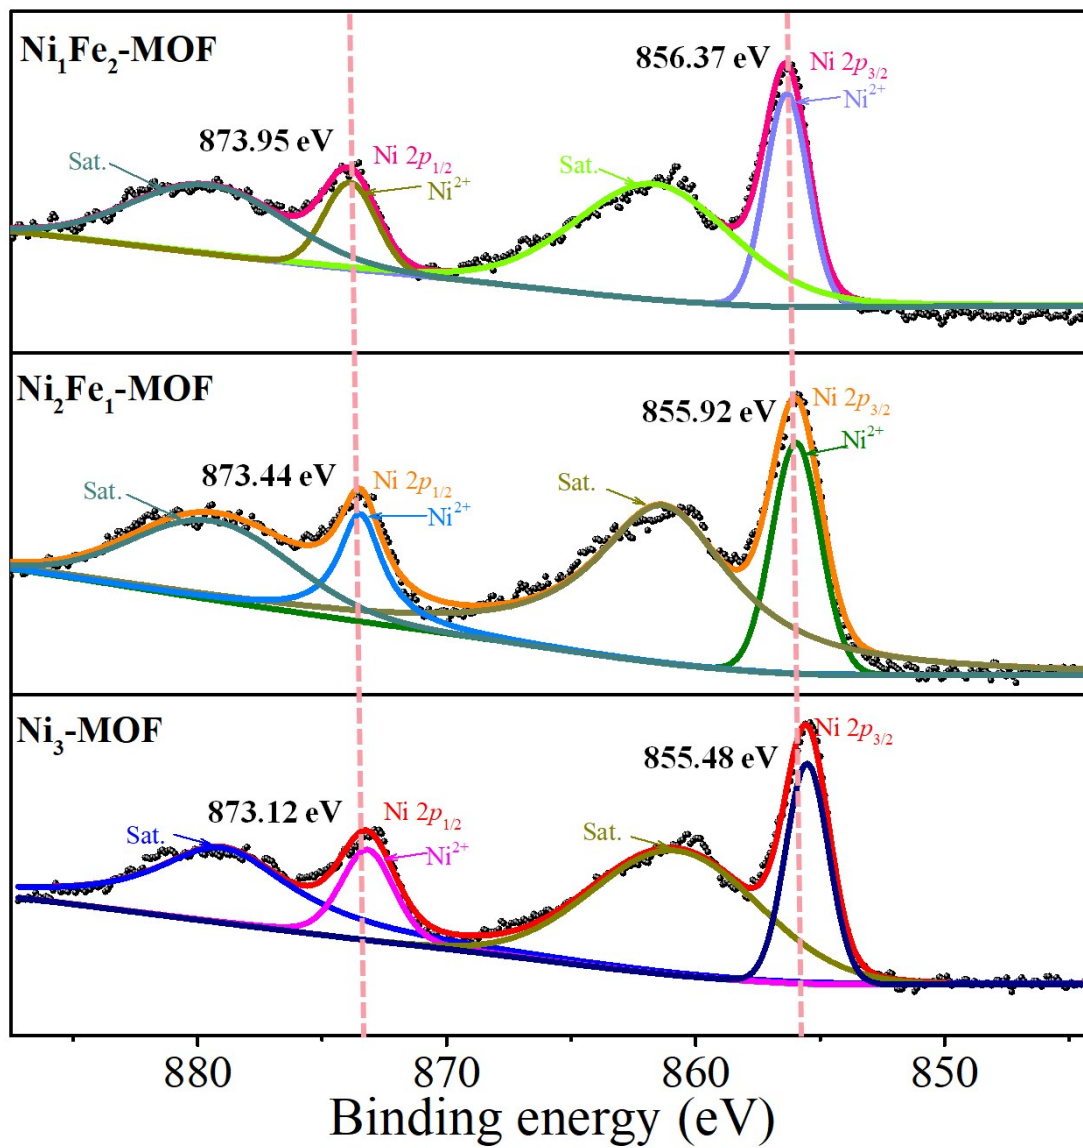

**Figure S41.** High-resolution XPS spectra of Ni<sub>3</sub>-MOF, Ni<sub>2</sub>Fe<sub>1</sub>-MOF and Ni<sub>1</sub>Fe<sub>2</sub>-MOF for Ni 2p orbital.

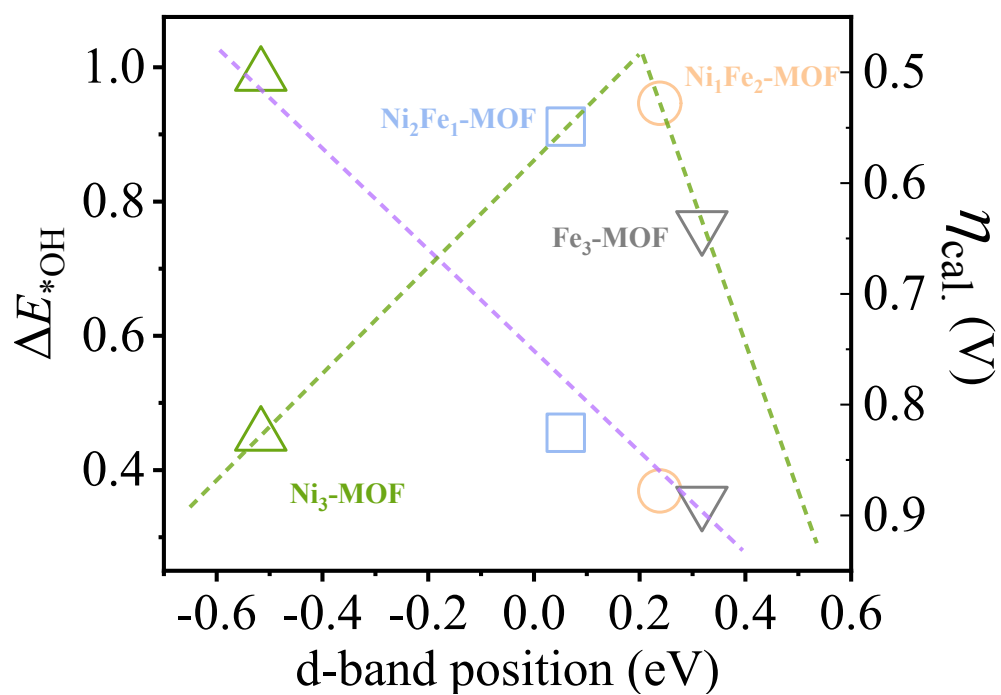

**Figure S42.** The calculated overpotentials of ORR with the d-band positions (the scaling relationship between the binding energy of \*OH and the d-band positions was also plotted).

**Table S1.** Crystallographic Data and Structural Refinements for **Ni3-MOF**.

| Compound                 | <b>Ni3-MOF</b>                 |
|--------------------------|--------------------------------|
| Chemical formula         | $C_{42}H_{30}O_{14}N_{12}Ni_3$ |
| Formula weight           | 1102.91                        |
| Temperature (K)          | 100(10)                        |
| Crystal system           | Monoclinic                     |
| Space group              | $C2/c$                         |
| $a/\text{\AA}$           | 9.87079 (13)                   |
| $b/\text{\AA}$           | 30.4338 (4)                    |
| $c/\text{\AA}$           | 16.92775 (17)                  |
| $\beta/^\circ$           | 91.2934 (11)                   |
| $V/\text{\AA}^3$         | 5083.89 (10)                   |
| $Z$                      | 4                              |
| $D_c / \text{g cm}^{-3}$ | 1.441                          |
| $R_{\text{int}}$         | 0.0325                         |
| $R_1 (>2\sigma)$         | 0.040                          |
| $wR_2$ (all data)        | 0.1056                         |
| Completeness             | 0.996                          |
| GOF                      | 1.055                          |

**Table S2.** Selected bond lengths (Å) and angles (°) for Complexes.

|         |             |         |             |
|---------|-------------|---------|-------------|
| Ni1—O1  | 2.0235 (15) | Ni2—O2D | 2.1227 (15) |
| Ni1—O1A | 2.0235 (15) | Ni2—O3E | 1.9982 (16) |
| Ni1—O2  | 2.2364 (15) | Ni2—O5  | 2.0803 (15) |
| Ni1—O2A | 2.2364 (15) | Ni2—O6  | 2.1353 (16) |
| Ni1—N6B | 2.0304 (19) | Ni2—O7  | 2.0671 (16) |
| Ni1—N6C | 2.0304 (19) | Ni2—N1  | 2.0670 (19) |

|                                         |            |                                       |            |
|-----------------------------------------|------------|---------------------------------------|------------|
| O1—Ni1—O1 <sup>i</sup>                  | 159.45 (9) | O2 <sup>iv</sup> —Ni2—O6              | 93.56 (6)  |
| O1 <sup>i</sup> —Ni1—O2 <sup>i</sup>    | 61.50 (6)  | O3 <sup>v</sup> —Ni2—O2 <sup>iv</sup> | 85.77 (6)  |
| O1—Ni1—O2                               | 61.50 (6)  | O3 <sup>v</sup> —Ni2—O5               | 167.00 (7) |
| O1—Ni1—O2 <sup>i</sup>                  | 102.81 (6) | O3 <sup>v</sup> —Ni2—O6               | 104.28 (6) |
| O1 <sup>i</sup> —Ni1—O2                 | 102.81 (6) | O3 <sup>v</sup> —Ni2—O7               | 91.14 (6)  |
| O1—Ni1—N6 <sup>ii</sup>                 | 95.72 (7)  | O3 <sup>v</sup> —Ni2—N1               | 94.04 (7)  |
| O1—Ni1—N6 <sup>iii</sup>                | 97.87 (7)  | O5—Ni2—O2 <sup>iv</sup>               | 94.45 (6)  |
| O1 <sup>i</sup> —Ni1—N6 <sup>ii</sup>   | 97.88 (7)  | O5—Ni2—O6                             | 62.72 (6)  |
| O1 <sup>i</sup> —Ni1—N6 <sup>iii</sup>  | 95.72 (7)  | O7—Ni2—O2 <sup>iv</sup>               | 175.86 (6) |
| O2 <sup>i</sup> —Ni1—O2                 | 88.53 (8)  | O7—Ni2—O5                             | 87.95 (6)  |
| N6 <sup>ii</sup> —Ni1—O2                | 156.61 (7) | O7—Ni2—O6                             | 84.52 (6)  |
| N6 <sup>iii</sup> —Ni1—O2 <sup>i</sup>  | 156.61 (7) | O7—Ni2—N1                             | 94.98 (7)  |
| N6 <sup>iii</sup> —Ni1—O2               | 91.85 (7)  | N1—Ni2—O2 <sup>iv</sup>               | 87.99 (7)  |
| N6 <sup>ii</sup> —Ni1—O2 <sup>i</sup>   | 91.85 (7)  | N1—Ni2—O5                             | 98.95 (7)  |
| N6 <sup>ii</sup> —Ni1—N6 <sup>iii</sup> | 96.89 (11) | N1—Ni2—O6                             | 161.67 (7) |

**Table S3.** Determining the metal content of  $\text{Ni}_{3(1-x)}\text{Fe}_{3x}\text{-MOF}$  by ICP-MS.

| $n_{\text{Fe}}:n_{\text{Ni}}$ (addition)                          | 0.5:1                                       | 1:1                                 | 2:1                                         | 3:1                                         | 4:1                                         | 5:1                                 | 6:1                                 |
|-------------------------------------------------------------------|---------------------------------------------|-------------------------------------|---------------------------------------------|---------------------------------------------|---------------------------------------------|-------------------------------------|-------------------------------------|
| $\text{Fe}^{57}$ (ug/L)                                           | 34.10                                       | 50.84                               | 73.28                                       | 75.53                                       | 96.76                                       | 105.83                              | 110.48                              |
| $\text{Ni}^{58}$ (ug/L)                                           | 130.88                                      | 104.17                              | 80.42                                       | 77.67                                       | 67.43                                       | 53.58                               | 56.75                               |
| $n_{\text{Fe}}:n_{\text{Ni}}$ (ICP-MS)                            | 0.26:1.00                                   | 0.49:1.00                           | 0.75:1.00                                   | 0.99:1.00                                   | 1.46:1.00                                   | 2.01:1.00                           | 1.98:1.00                           |
| $x = n_{\text{Fe}} / (n_{\text{Fe}} + n_{\text{Ni}})$<br>(ICP-MS) | 0.21                                        | 0.33                                | 0.43                                        | 0.5                                         | 0.6                                         | 0.67                                | 0.67                                |
| $\text{Ni}_{3(1-x)}\text{Fe}_{3x}\text{-MOF}$                     | $\text{Ni}_{2.4}\text{Fe}_{0.6}\text{-MOF}$ | $\text{Ni}_2\text{Fe}_1\text{-MOF}$ | $\text{Ni}_{1.8}\text{Fe}_{1.2}\text{-MOF}$ | $\text{Ni}_{1.5}\text{Fe}_{1.5}\text{-MOF}$ | $\text{Ni}_{1.2}\text{Fe}_{1.8}\text{-MOF}$ | $\text{Ni}_1\text{Fe}_2\text{-MOF}$ | $\text{Ni}_1\text{Fe}_2\text{-MOF}$ |

**Table S4.** Comparison of the OER activities of MOFs in 0.1 M KOH solution.

| Catalysts                                             | Overpotential (mV)<br>(at $J=10 \text{ mA cm}^{-2}$ ) | Tafel slope<br>( $\text{mV dec}^{-1}$ ) | Substrate | Binder | Reference                                              |
|-------------------------------------------------------|-------------------------------------------------------|-----------------------------------------|-----------|--------|--------------------------------------------------------|
| <b>Ni<sub>3</sub>-MOF</b>                             | 369                                                   | 47                                      | GC        | Nafion | This work                                              |
|                                                       | 266                                                   | 158                                     | Ni foam   | Null   |                                                        |
| <b>Ni<sub>2</sub>Fe<sub>1</sub>-MOF</b>               | 330                                                   | 46                                      | GC        | Nafion |                                                        |
|                                                       | 225                                                   | 92                                      | Ni foam   | Null   |                                                        |
| <b>Ni<sub>1</sub>Fe<sub>2</sub>-MOF</b>               | 283                                                   | 41                                      | GC        | Nafion |                                                        |
|                                                       | 186                                                   | 98                                      | Ni foam   | Null   |                                                        |
| <b>4.3%-NiFe-MOF</b>                                  | 210<br>(at $J=200 \text{ mA cm}^{-2}$ )               | 68                                      | Ni foam   | Null   | <i>Nat. Energy</i> <b>2019</b> , 4, 115.               |
| <b>NCF MOF</b>                                        | 190                                                   | 49                                      | Ni foam   | Nul    | <i>Adv. Funct. Mater.</i> <b>2018</b> , 28, 1802129.   |
|                                                       | 320                                                   | NA                                      | GC        | Nafion |                                                        |
| <b>Fe:2D-Co-NS</b>                                    | 211                                                   | 43                                      | Ni foam   | Null   | <i>Angew. Chem. Int. Ed.</i> <b>2018</b> , 57, 4632.   |
|                                                       | 282                                                   | 59                                      | GC        | Nafion |                                                        |
| <b>Fe<sub>3</sub>-Co<sub>2</sub></b>                  | 283                                                   | 43                                      | GC        | Nafion | <i>J. Am. Chem. Soc.</i> <b>2017</b> , 139, 1778.      |
|                                                       | 225                                                   | 48                                      | Ni foam   | Nafion |                                                        |
|                                                       | 237                                                   | 79                                      | Cu foam   | Nafion |                                                        |
| <b>NiFe-MOF</b>                                       | 240                                                   | 34                                      | Ni foam   | Null   | <i>Nat. Commun.</i> <b>2017</b> , 8, 15341.            |
| <b>CTGU-10c2</b>                                      | 240                                                   | 58                                      | GC        | Nafion | <i>Angew. Chem. Int. Ed.</i> <b>2019</b> , 58, 4227.   |
| <b>Pt3.2%@NiNSMOFs</b>                                | 298                                                   | 107                                     | RRDE      | Nafion | <i>Appl. Catal. B-Environ.</i> <b>2019</b> , 245, 389. |
| <b>NNU-23</b>                                         | 365                                                   | 81.2                                    | CC        | Nafion | <i>Angew. Chem. Int. Ed.</i> <b>2018</b> , 57, 9660.   |
| <b>Fe<sub>2</sub>Co-MOF</b>                           | 402                                                   | 81.2                                    | GC        | Nafion | <i>Inorg. Chem.</i> <b>2020</b> , 59, 6078.            |
| <b>Ti<sub>3</sub>C<sub>2</sub>T<sub>x</sub>-CoBDC</b> | 410                                                   | 48.2                                    | GC        | Nafion | <i>ACS Nano</i> , <b>2017</b> , 11, 5800.              |
| <b>MAF-X27-OH</b>                                     | 461                                                   | 66                                      | GC        | Nafion | <i>J. Am. Chem. Soc.</i> <b>2016</b> , 138, 8336       |
| <b>Co-WOC-1</b>                                       | 390<br>(at $J=1 \text{ mA cm}^{-2}$ )                 | 128                                     | GC        | Nafion | <i>Angew. Chem. Int. Ed.</i> <b>2016</b> , 55, 2425.   |
| <b>Co-ZIF-9</b>                                       | 510<br>(at $J=1 \text{ mA cm}^{-2}$ )                 | 93                                      | FTO glass | Nafion | <i>Nanoscale</i> <b>2014</b> , 6, 9930-9934.           |
| <b>IrO<sub>2</sub>/C(52 wt%)</b>                      | 310                                                   | 97                                      | Cu foil   | Null   | <i>J. Am. Chem. Soc.</i> <b>2014</b> , 136, 13925.     |
| <b>RuO<sub>2</sub></b>                                | 320                                                   | 62                                      | GC        | Nafion | <i>Angew. Chem. Int. Ed.</i> <b>2019</b> , 58, 4227.   |

**Table S5.** Comparison of the HER activities of MOFs in 0.1 M KOH solution.

| Catalysts                               | Overpotential (mV)<br>(at $J=10 \text{ mA cm}^{-2}$ ) | Tafel slope<br>( $\text{mV dec}^{-1}$ ) | Substrate | Binder | Reference                                                   |
|-----------------------------------------|-------------------------------------------------------|-----------------------------------------|-----------|--------|-------------------------------------------------------------|
| <b>Ni<sub>3</sub>-MOF</b>               | 537                                                   | 133                                     | GC        | Nafion | This work                                                   |
|                                         | 229                                                   | 99                                      | Ni foam   | Null   |                                                             |
| <b>Ni<sub>2</sub>Fe<sub>1</sub>-MOF</b> | 484                                                   | 131                                     | GC        | Nafion |                                                             |
|                                         | 203                                                   | 80                                      | Ni foam   | Null   |                                                             |
| <b>Ni<sub>1</sub>Fe<sub>2</sub>-MOF</b> | 373                                                   | 107                                     | GC        | Nafion |                                                             |
|                                         | 155                                                   | 71                                      | Ni foam   | Null   |                                                             |
| <b>NCF MOF</b>                          | 110                                                   | 114                                     | Ni foam   | Null   | <i>Adv. Funct. Mater.</i> <b>2018</b> , 28, 1802129.        |
|                                         | 270                                                   | NA                                      | GC        | Nafion |                                                             |
| <b>HUST-200</b>                         | 131                                                   | 51                                      | GC        | Nafion | <i>ACS Appl. Mater. Interfaces</i> <b>2018</b> , 10, 31498. |
| <b>NiFe-MOF</b>                         | 134                                                   | NA                                      | Ni foam   | Null   | <i>Nat. Commun.</i> <b>2017</b> , 8, 15341.                 |
| <b>Fe<sub>2</sub>Zn-MOF</b>             | 221                                                   | 174                                     | GC        | Nafion | <i>Inorg. Chem.</i> <b>2020</b> , 59, 6078.                 |
| <b>IrO<sub>2</sub>/C(20 wt%)</b>        | 122                                                   | 252.6                                   | GC        | Nafion | <i>Inorg. Chem.</i> <b>2020</b> , 59, 6078.                 |

**Table S6** Comparison of the ORR activities of MOFs in in 0.1 M KOH solution.

| Catalysts                                | $E_{\text{onset}}$<br>(V vs RHE) | $E_{1/2}$<br>(V vs RHE) | $J_{\text{lim}}$<br>(mA cm <sup>-2</sup> ) | Electron transfers<br>Number ( $n$ ) | Reference                                             |
|------------------------------------------|----------------------------------|-------------------------|--------------------------------------------|--------------------------------------|-------------------------------------------------------|
| <b>Ni<sub>3</sub>-MOF</b>                | 0.792                            | 0.651                   | -3.42                                      | 2.49                                 | This work                                             |
| <b>Ni<sub>2</sub>Fe<sub>1</sub>-MOF</b>  | 0.795                            | 0.663                   | -3.99                                      | 3.82                                 |                                                       |
| <b>Ni<sub>1</sub>Fe<sub>2</sub>-MOF</b>  | 0.802                            | 0.676                   | -5.02                                      | 3.96                                 |                                                       |
| <b>(G-dye-FeP)<sub>n</sub> MOF</b>       | 0.93                             | 0.78                    | -6.3                                       | 3.82                                 | <i>J.Am. Chem. Soc.</i> <b>2012</b> , 134, 6707.      |
| <b>4.3%-NiFe-MOF</b>                     | 0.92                             | 0.83                    | -5.2                                       | 3.8                                  | <i>Nat. Energy</i> <b>2019</b> , 4, 115.              |
| <b>PcCu-O<sub>8</sub>-Co/CNT</b>         | 0.86                             | 0.83                    | -5.3                                       | 3.93                                 | <i>Angew.Chem. Int.Ed.</i> <b>2019</b> , 58 ,10677.   |
| <b>MCCF/NiMn-MOFs</b>                    | 0.85                             | 0.73                    | -5.6                                       | 3.86                                 | <i>Angew. Chem. Int. Ed.</i> <b>2020</b> , 59, 18234. |
| <b>PCN-226(Co)</b>                       | 0.83                             | 0.75                    | -2.9                                       | 3.3                                  | <i>J.Am. Chem. Soc.</i> <b>2020</b> ,142, 15386.      |
| <b>[Ni<sub>3</sub>(tha)<sub>2</sub>]</b> | 0.82                             | 0.67                    | -2.5                                       | 2.25                                 | <i>Nat. Commun.</i> <b>2016</b> , 7, 10942.           |
| <b>Ni/Co-MOF</b>                         | 0.76                             | 0.62                    | -4.5                                       | 3.7                                  | <i>Nano Lett.</i> <b>2017</b> , 9, 43.                |
| <b>Co-Al-PMOF</b>                        | 0.75                             | 0.55                    | -0.6                                       | 2.9                                  | <i>Chem. Commun</i> <b>2017</b> , 53, 6496.           |
| <b>HKUST-1</b>                           | 0.71                             | 0.56                    | -4.9                                       | 1.74                                 | <i>Angew. Chem. Int. Ed.</i> <b>2016</b> , 55, 15301. |
| <b>(Fe-P)<sub>n</sub> MOF</b>            | 0.7                              | 0.57                    | -2.6                                       | 1.93                                 | <i>J.Am. Chem. Soc.</i> <b>2012</b> , 134, 6707.      |
| <b>MIL-100(Fe)</b>                       | 0.7                              | 0.59                    | -3.8                                       | 2.1                                  | <i>Chin. J. Catal.</i> <b>2014</b> , 35, 185.         |



**Table S7.** The value of electron transfer numbers of **Ni<sub>3</sub>-MOF@GC**, **Ni<sub>2</sub>Fe<sub>1</sub>-MOF@GC**, and **Ni<sub>1</sub>Fe<sub>2</sub>-MOF@GC** in O<sub>2</sub>-saturated 0.1 M KOH solution.

| Sample                    | Ni <sub>3</sub> -MOF | Ni <sub>2</sub> Fe <sub>1</sub> -MOF | Ni <sub>1</sub> Fe <sub>2</sub> -MOF |
|---------------------------|----------------------|--------------------------------------|--------------------------------------|
| Electron Transfer Numbers | 2.49                 | 3.82                                 | 3.96                                 |

**Table S8.** Comparison of the  $\Delta E$  ( $\Delta E = E_{OER} - E_{1/2}$ ) activities of MOFs and recently reported active catalysts.

| Catalyst                             | $E_{ORR}$ (V)<br>(Half-wave Potential) | $E_{OER}$ (V)<br>(at $J=10 \text{ mA cm}^{-2}$ ) | $\Delta E = E_{ORR} - E_{OER}$ (V) | Reference                                             |
|--------------------------------------|----------------------------------------|--------------------------------------------------|------------------------------------|-------------------------------------------------------|
| Ni <sub>3</sub> -MOF                 | 0.651                                  | 1.599                                            | 0.948                              | This work                                             |
| Ni <sub>2</sub> Fe <sub>1</sub> -MOF | 0.663                                  | 1.56                                             | 0.897                              |                                                       |
| Ni <sub>1</sub> Fe <sub>2</sub> -MOF | 0.676                                  | 1.513                                            | 0.837                              |                                                       |
| 4.3%-NiFe-MOF                        | 0.83                                   | 1.53<br>(at $J=2000 \text{ mA cm}^{-2}$ )        | 0.7                                | <i>Nat. Energy</i> , <b>2019</b> , 4, 115.            |
| MCCF/NiMn-MOFs                       | 0.73                                   | 1.51                                             | 0.78                               | <i>Angew. Chem. Int. Ed.</i> <b>2020</b> , 59, 18234. |

**Table S9.** Comparison of the water splitting activities of MOFs.

| Catalysts                               | Water splitting potential (V) @10mA cm <sup>-2</sup> | Overpotential (mV) OER @10mA cm <sup>-2</sup> | Overpotential (mV) HER @10mA cm <sup>-2</sup> | Substrate | Binder | Reference                                                                 |
|-----------------------------------------|------------------------------------------------------|-----------------------------------------------|-----------------------------------------------|-----------|--------|---------------------------------------------------------------------------|
| <b>Ni<sub>3</sub>-MOF</b>               | 1.675                                                | 266                                           | 229                                           |           |        |                                                                           |
| <b>Ni<sub>2</sub>Fe<sub>1</sub>-MOF</b> | 1.631                                                | 225                                           | 203                                           | Ni foam   | Null   | <i>This work</i>                                                          |
| <b>Ni<sub>1</sub>Fe<sub>2</sub>-MOF</b> | 1.54                                                 | 186                                           | 155                                           |           |        |                                                                           |
| <b>Pt/C-RuO<sub>2</sub></b>             | 1.597                                                | 427                                           | 111                                           | Ni foam   | Null   |                                                                           |
| <b>Ni/Fe-MOF</b>                        | 1.55                                                 | 240                                           | 134                                           | Ni foam   | Null   | <i>Nat. Commun.</i><br><b>2017</b> , 8, 15341.                            |
| <b>NiFe-MS/MOF</b>                      | 1.61<br>(at <i>J</i> =50 mA cm <sup>-2</sup> )       | 230<br>(at <i>J</i> =50mA cm <sup>-2</sup> )  | 156<br>(at <i>J</i> =50mA cm <sup>-2</sup> )  | Ni foam   | Null   | <i>Adv.Sci.</i><br><b>2020</b> , 7, 2001965.                              |
| <b>MFN-MOFs (2:1)</b>                   | 1.495                                                | 235<br>(at <i>J</i> =50mA cm <sup>-2</sup> )  | 79                                            | Ni foam   | Null   | <i>Nano Energy</i><br><b>2019</b> , 57, 1.                                |
| <b>D-Ni-MOF</b>                         | 1.5                                                  | 219                                           | 101                                           | Ni foam   | Null   | <i>Small</i> <b>2020</b> ,16,<br>1906564.                                 |
| <b>NFN-MOF</b>                          | 1.56                                                 | 240                                           | 87                                            | Ni foam   | Null   | <i>Adv. Energy Mater.</i><br><b>2018</b> , 1801065.                       |
| <b>FeNi(BDC)(DMF,F )</b>                | 1.58                                                 | 227<br>(at <i>J</i> =60mA cm <sup>-2</sup> )  | 234<br>(at <i>J</i> =60mA cm <sup>-2</sup> )  | Ni foam   | Null   | <i>Applied Catalysis B: Environmental</i> .<br><b>2019</b> , 258, 118023. |

**Table S10.** Comparison of the trifunctional activities of MOFs and recently reported active catalysts in 0.1M KOH solution.

| Catalysts                                         | Overpotential (mV)<br>OER@10mA cm <sup>-2</sup> | Overpotential (mV)<br>HER@10mA cm <sup>-2</sup> | $E_{1/2}$ (V vs<br>RHE) ORR | Reference                                                |
|---------------------------------------------------|-------------------------------------------------|-------------------------------------------------|-----------------------------|----------------------------------------------------------|
| <b>Ni<sub>3</sub>-MOF</b>                         | 369                                             | 537                                             | 0.651                       | <i>This work</i>                                         |
| <b>Ni<sub>2</sub>Fe<sub>1</sub>-MOF</b>           | 330                                             | 484                                             | 0.663                       |                                                          |
| <b>Ni<sub>3</sub>Fe<sub>2</sub>-MOF</b>           | 283                                             | 373                                             | 0.676                       |                                                          |
| P-3G                                              | 320                                             | 230                                             | 0.82                        | <i>J. Mater. Chem. A</i> <b>2019</b> ,<br>7, 2048.       |
| FeCo/Co <sub>2</sub> P@NPCF                       | 330                                             | 260                                             | 0.79                        | <i>Adv. Energy Mater.</i> <b>2020</b> ,<br>10, 1903854.  |
| Fe <sub>3</sub> C-Co/NC                           | 340                                             | 238                                             | 0.885                       | <i>Adv. Energy Mater.</i> <b>2019</b> ,<br>29, 1901949.  |
| GH-BGQD2                                          | 370                                             | 130                                             | 0.87                        | <i>Adv. Energy Mater.</i> <b>2019</b> ,<br>9, 1900945.   |
| PPy/FeTCPP/Co                                     | 380                                             | 240                                             | 0.86                        | <i>Adv. Funct. Mater.</i> <b>2017</b> ,<br>27, 1606497.  |
| G@N-MoS <sub>2</sub>                              | 390                                             | 243                                             | 0.716                       | <i>Adv. Mater.</i> <b>2018</b> , 30,<br>1705110.         |
| Co-CoO/N-rGO                                      | 390                                             | 330                                             | 0.78                        | <i>Adv. Funct. Mater.</i> <b>2015</b> ,<br>25, 5799.     |
| Co/CoO@Co-N-C-800                                 | 392                                             | 413                                             | 0.787                       | <i>Chem. Commun.</i> <b>2016</b> ,<br>52, 5946.          |
| A-PBCCF-H                                         | 410                                             | 224                                             | 0.76                        | <i>Nano Energy</i> <b>2017</b> , 32,<br>247.             |
| SHG                                               | 410                                             | 310                                             | 0.87                        | <i>Adv. Mater.</i> <b>2017</b> , 29,<br>1604942.         |
| CoO@Co/N-rGO                                      | 420                                             | 237                                             | 0.81                        | <i>J. Mater. Chem. A</i> <b>2017</b> ,<br>5, 5865.       |
| Fe-N <sub>4</sub> SAs/NPC                         | 430                                             | 202                                             | 0.885                       | <i>Angew. Chem. Int. Ed.</i><br><b>2018</b> , 57, 8614.  |
| Co-Co <sub>9</sub> S <sub>8</sub> @SNCNTs-<br>900 | 450                                             | 240                                             | 0.81                        | <i>Nano Energy</i> <b>2019</b> , 56,<br>724–732.         |
| C <sub>60</sub> -SWCNT <sub>15</sub>              | 460                                             | 380                                             | 0.84                        | <i>J. Am. Chem. Soc.</i> <b>2019</b> ,<br>141, 11658.    |
| GO-PANi-FP                                        | 560                                             | 520                                             | 0.72                        | <i>Angew. Chem. Int. Ed.</i><br><b>2016</b> , 55, 13296. |
| GO-PANi31-FP                                      | 590                                             | 520                                             | 0.72                        | <i>Angew. Chem.</i> <b>2016</b> , 128,<br>13490.         |
